# Supplementary material for: Distinct selective alkene hydrosilylation catalyzed by acylenalato cobalt hydrides
Source: Royal Society of Chemistry journal article supplement (doi:10.1039/d3nj03878e), 2023-01-01
Supplement: d3nj03878e1.pdf [file d3nj03878e1.pdf]

## Supporting Information

### Distinct Selective Alkene Hydrosilylation Catalyzed by Acylenalato Cobalt

#### Hydrides

Xin Wang, Xiaoyan Li and Hongjian Sun\*

*School of Chemistry and Chemical Engineering, Key Laboratory of Special Functional Aggregated Materials, Ministry of Education, Shandong University, Shanda Nanlu 27, 250100 Jinan, People's Republic of China*

Correspondence author: [hjsun@sdu.edu.cn](mailto:hjsun@sdu.edu.cn)

#### CONTENTS:

|                                                                                                         |     |
|---------------------------------------------------------------------------------------------------------|-----|
| <b>SI</b> IR, <sup>1</sup> H and <sup>31</sup> P NMR spectra of complexes <b>1 - 3</b>                  | S2  |
| <b>SII</b> <sup>1</sup> H and <sup>13</sup> C NMR spectra of Hydrosilylation Products                   | S7  |
| <b>SIII</b> Mechanistic study                                                                           | S28 |
| <b>SIV</b> The competitive intermolecular catalytic hydrosilylation<br>of styrene and vinyl cyclohexane | S29 |
| <b>SV</b> Gram-Scale Reaction                                                                           | S29 |

### IR, $^1\text{H}$ , $^{31}\text{P}$ NMR Spectra of Complexes 1-3

Complex 1:  $^1\text{H}$  NMR (500 MHz, Benzene- $d_6$ , ppm):  $\delta$  2.70 (t,  $J = 6.0$  Hz, 2H), 2.33 (t,  $J = 6.1$  Hz, 2H), 1.67 (tt,  $J = 17.4, 6.0$  Hz, 4H), 1.17 (t,  $J = 3.5$  Hz, 18H), 1.04 (d,  $J = 5.8$  Hz, 9H), -26.70 (t,  $J = 61.5$  Hz, 1H).  $^{31}\text{P}$  NMR (202 MHz, Benzene- $d_6$ , ppm):  $\delta$  8.84 (2P), -2.46 (1P).

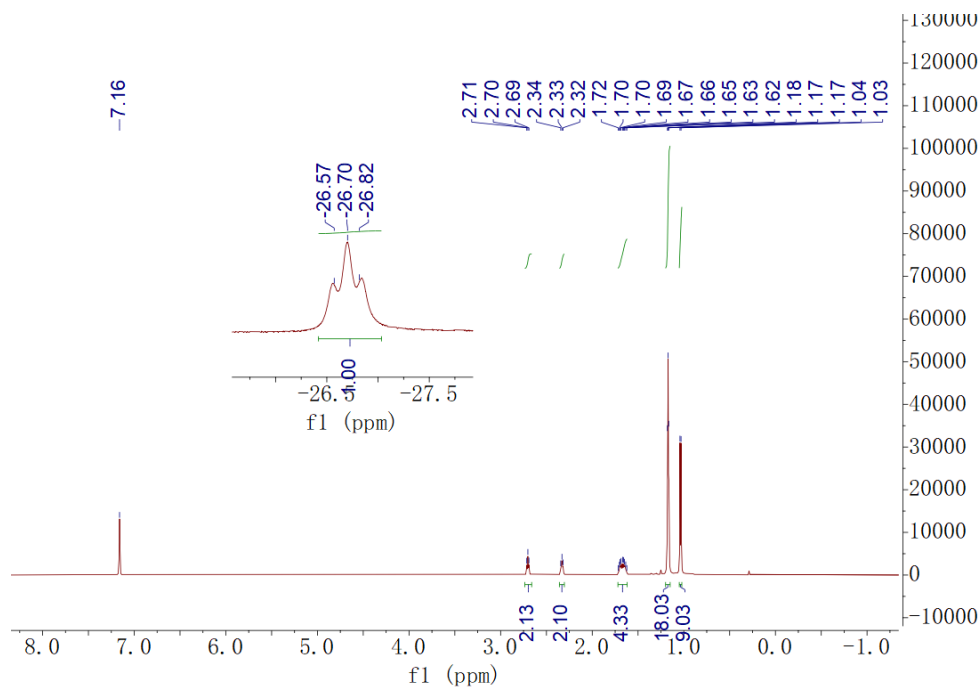

Fig.S1 The  $^1\text{H}$  NMR spectrum of complex 1 ( $\text{C}_6\text{D}_6$ )

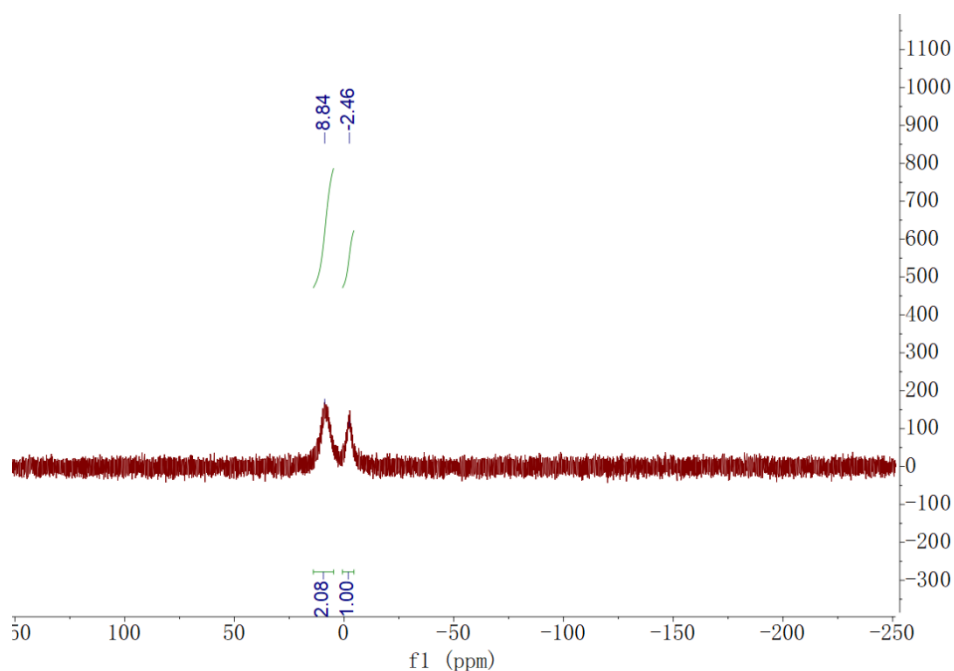

Fig.S2 The  $^{31}\text{P}$  NMR spectrum of complex 1 ( $\text{C}_6\text{D}_6$ )

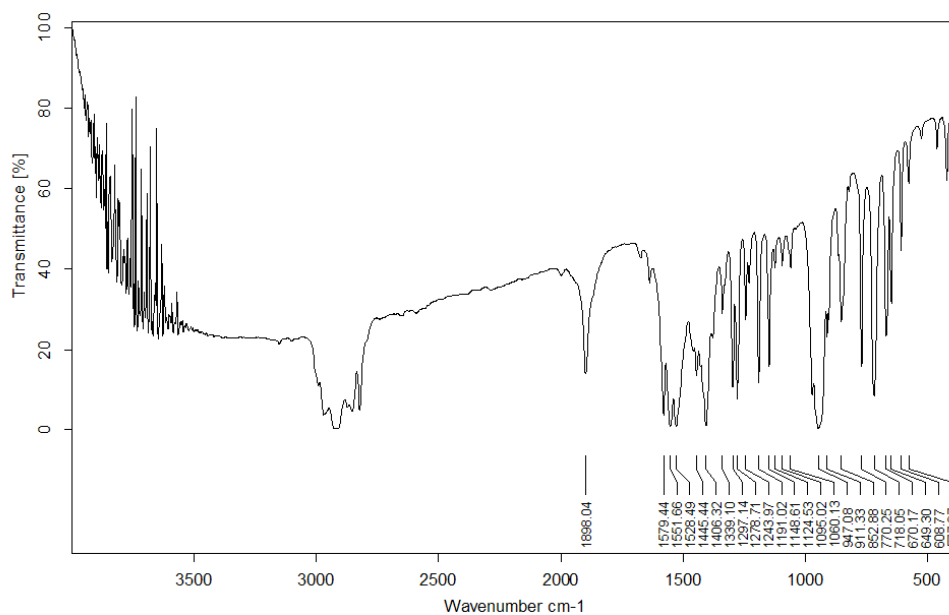

Fig.S3 The IR spectrum of complex 1

**Complex 2:**  $^1\text{H}$  NMR (500 MHz, Benzene- $\text{d}_6$ , ppm):  $\delta$  7.91 (s, 1H), 7.26 (s, 2H), 6.60 (s, 1H), 1.35 (s, 18H), 1.02 (s, 9H), -26.18 (t,  $J = 63.4$  Hz, 1H).  $^{31}\text{P}$  NMR (202 MHz, Benzene- $\text{d}_6$ , ppm):  $\delta$  6.40 (2P), -3.59 (1P).

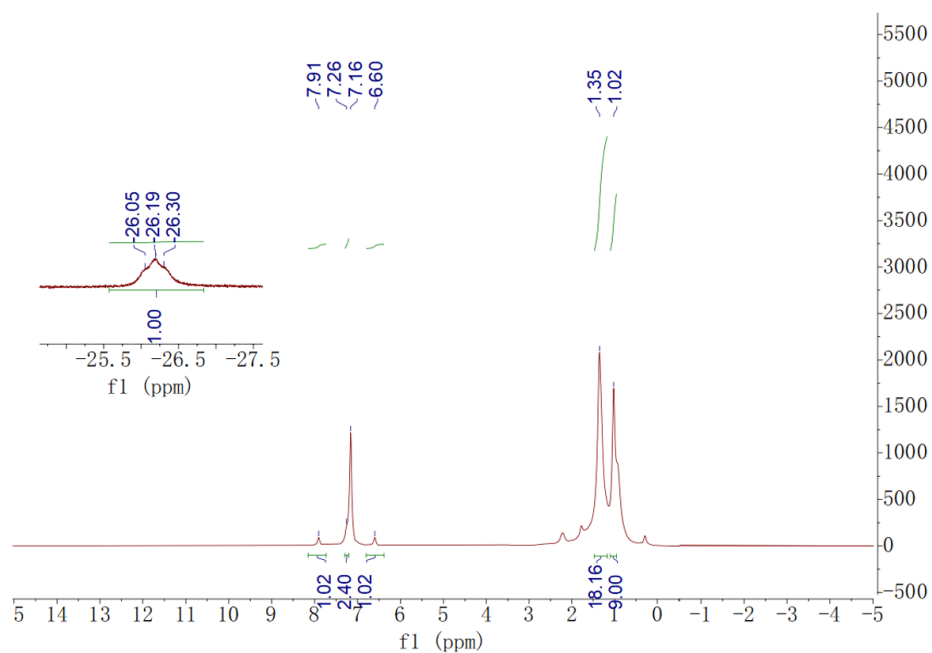

Fig.S4 The  $^1\text{H}$  NMR spectrum of complex 2 ( $\text{C}_6\text{D}_6$ )

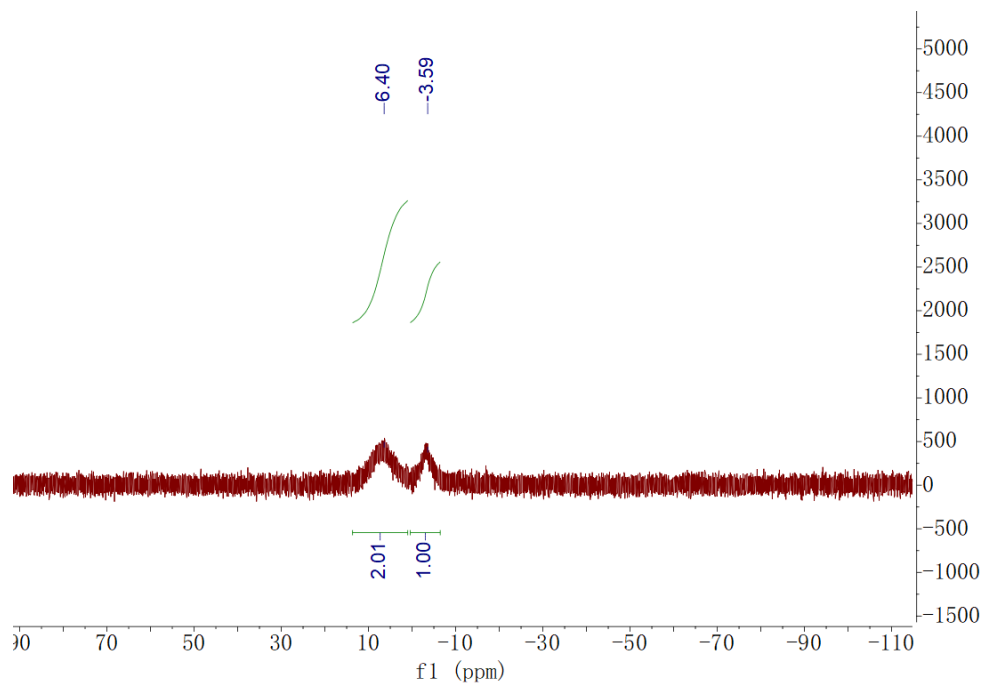

Fig.S5 The  $^{31}\text{P}$  NMR spectrum of complex **2** ( $\text{C}_6\text{D}_6$ )

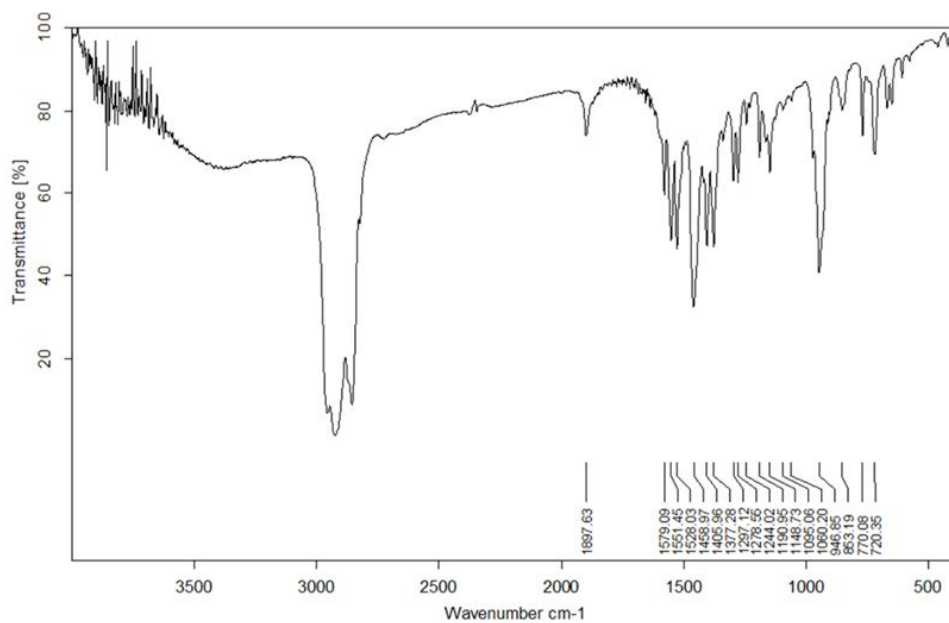

Fig.S6 The IR spectrum of complex **2**

Complex **3**:  $^1\text{H}$  NMR (500 MHz, Benzene- $d_6$ , ppm):  $\delta$  7.63 (s, 1H), 7.20 (s, 1H), 2.36 (s, 3H), 1.69 (s, 9H), 1.07 (d,  $J = 5.9$  Hz, 9H), 1.03 (s, 18H), -25.96 (t,  $J = 69.8$  Hz, 1H).  
 $^{31}\text{P}$  NMR (202 MHz, Benzene- $d_6$ , ppm):  $\delta$  7.13 (2P), -3.63 (1P).

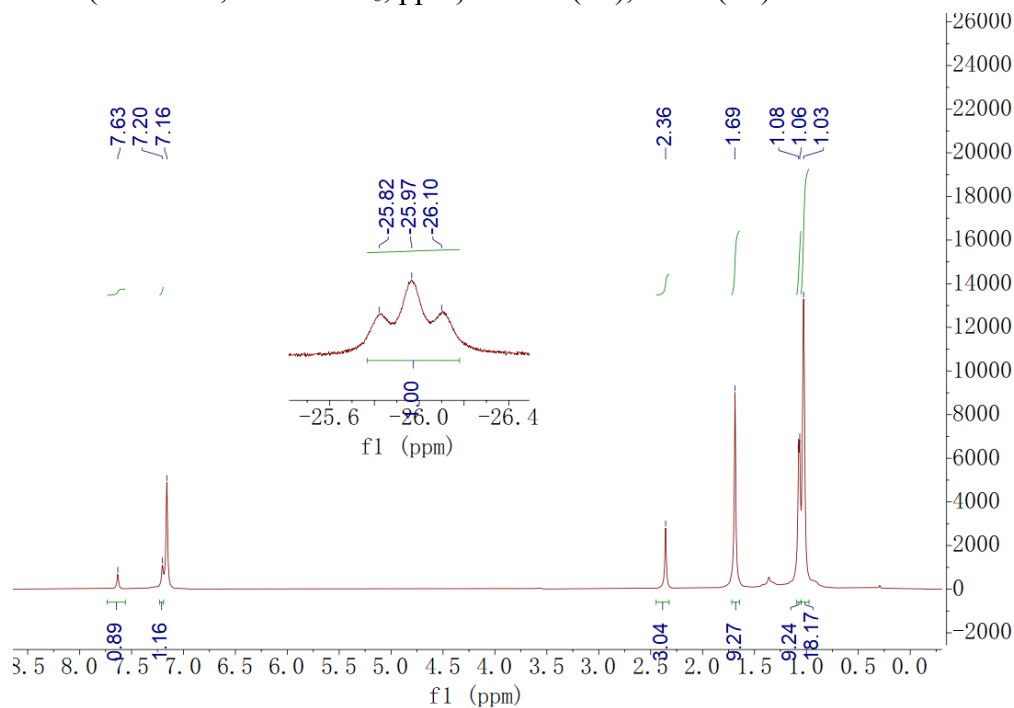

Fig.S7 The  $^1\text{H}$  NMR spectrum of complex **3** ( $\text{C}_6\text{D}_6$ )

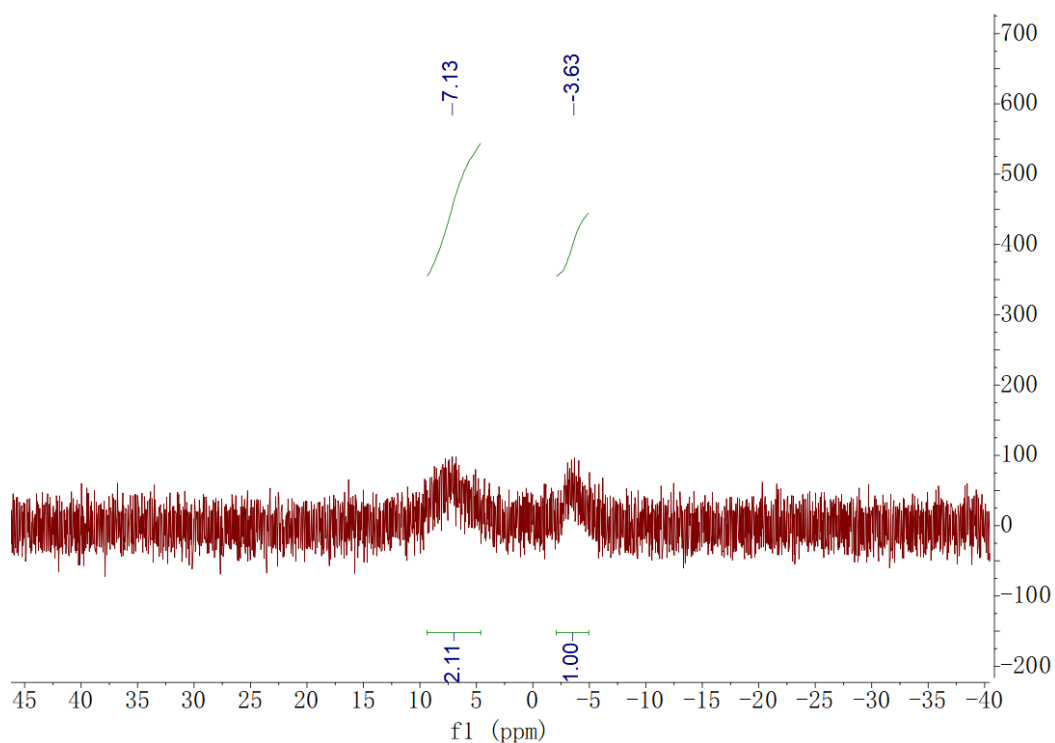

Fig.S8 The  $^{31}\text{P}$  NMR spectrum of complex **3** ( $\text{C}_6\text{D}_6$ )

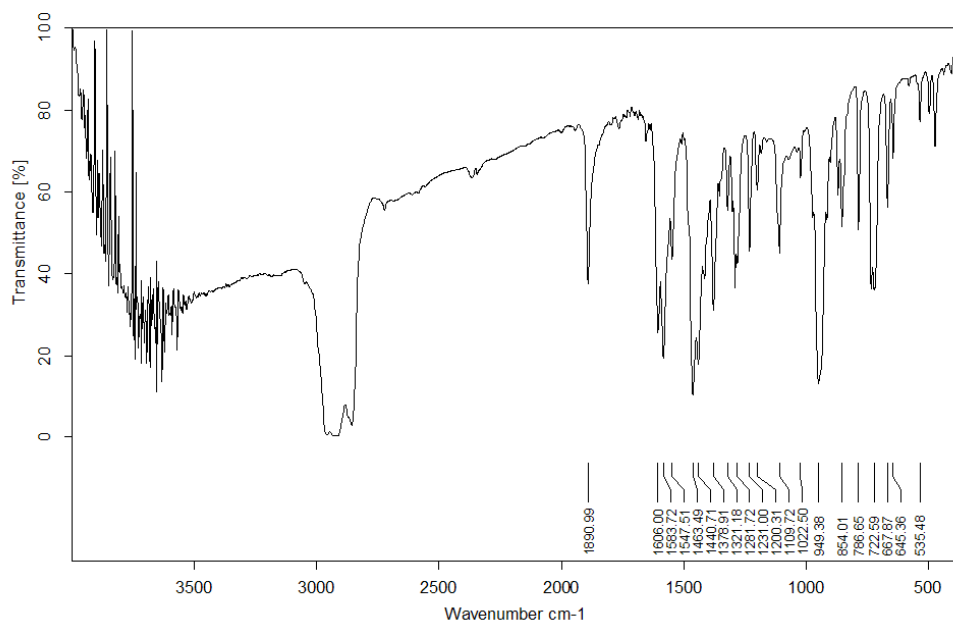

Fig.S9 The IR spectrum of complex 3

## SII $^1\text{H}$ and $^{13}\text{C}$ NMR Spectra of Hydrosilylation Products

### Diphenyl(1-phenylethyl)silane (**4a**)

$^1\text{H}$  NMR (300 MHz,  $\text{CDCl}_3$ )  $\delta$  7.55 – 7.48 (m, 2H), 7.42 – 7.30 (m, 6H), 7.30 – 7.22 (m, 2H), 7.18 (t,  $J = 7.7$  Hz, 2H), 7.08 (t,  $J = 7.2$  Hz, 1H), 7.00 (d,  $J = 8.3$  Hz, 2H), 4.83 (d,  $J = 3.4$  Hz, 1H), 2.82 (qd,  $J = 7.5, 3.4$  Hz, 1H), 1.46 (d,  $J = 7.6$  Hz, 3H).  $^{13}\text{C}$  NMR (75 MHz,  $\text{CDCl}_3$ )  $\delta$  144.37, 135.73, 135.58, 133.06, 129.73, 129.59, 128.18, 127.94, 127.74, 124.93, 77.47, 77.05, 76.62, 27.00, 16.52.

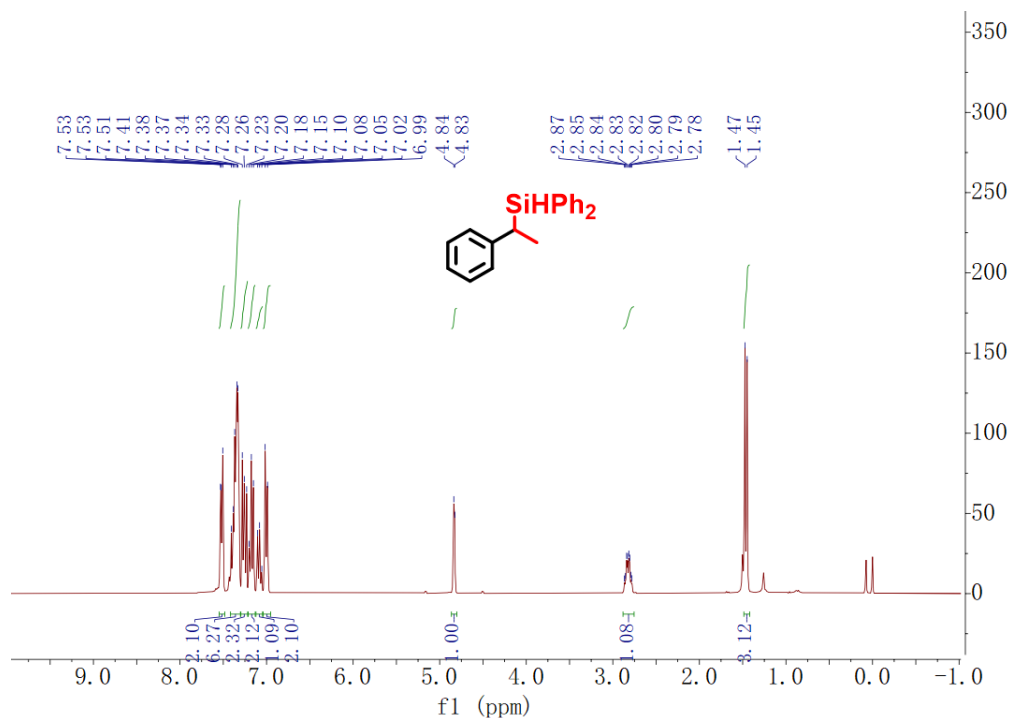

Fig.S10  $^1\text{H}$  NMR of **4a** ( $\text{CDCl}_3$ )

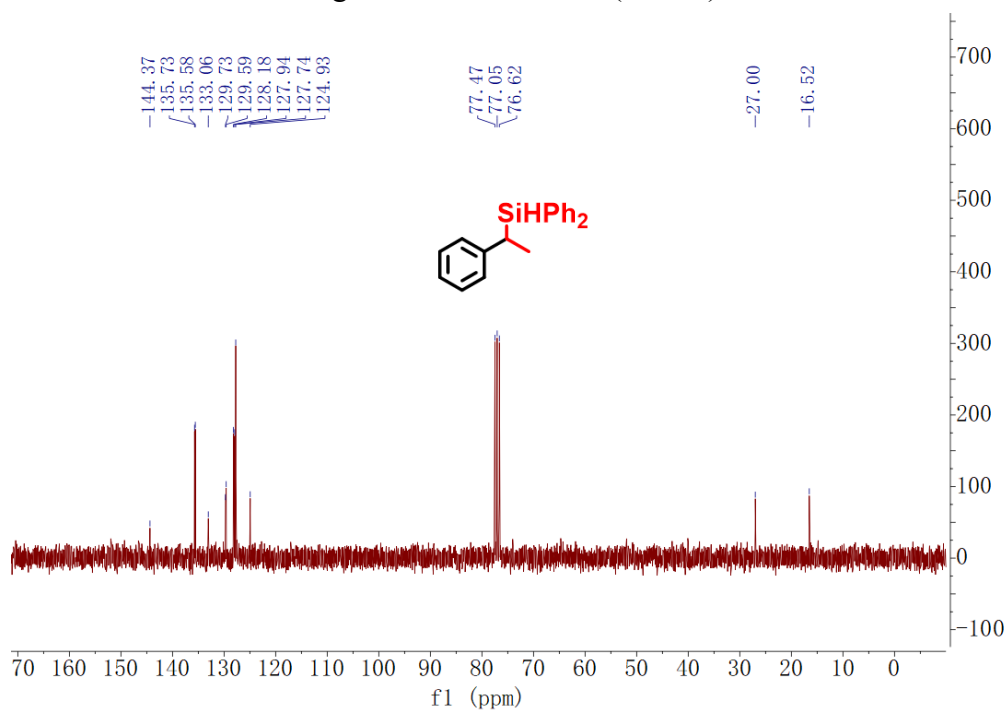

Fig.S11  $^{13}\text{C}$  NMR of **4a** ( $\text{CDCl}_3$ )

### Diphenyl(1-(*o*-tolyl)ethyl)silane (**4b**)

$^1\text{H}$  NMR (300 MHz,  $\text{CDCl}_3$ )  $\delta$  7.53 (dd,  $J=7.8, 1.6$  Hz, 2H), 7.42–7.27 (m, 6H), 7.25–7.19 (m, 2H), 7.14–7.07 (m, 1H), 7.06–6.99 (m, 3H), 4.80 (d,  $J=3.4$  Hz, 1H), 3.00 (qd,  $J=7.4, 3.4$  Hz, 1H), 2.07 (s, 3H), 1.44 (d,  $J=7.4$  Hz, 3H).  $^{13}\text{C}$  NMR (75 MHz,  $\text{CDCl}_3$ )  $\delta$  142.89, 135.88, 135.35, 133.41, 132.90, 130.12, 129.81, 129.58, 127.99, 127.74, 126.83, 126.10, 124.79, 77.50, 77.08, 76.65, 22.08, 20.14, 16.65.

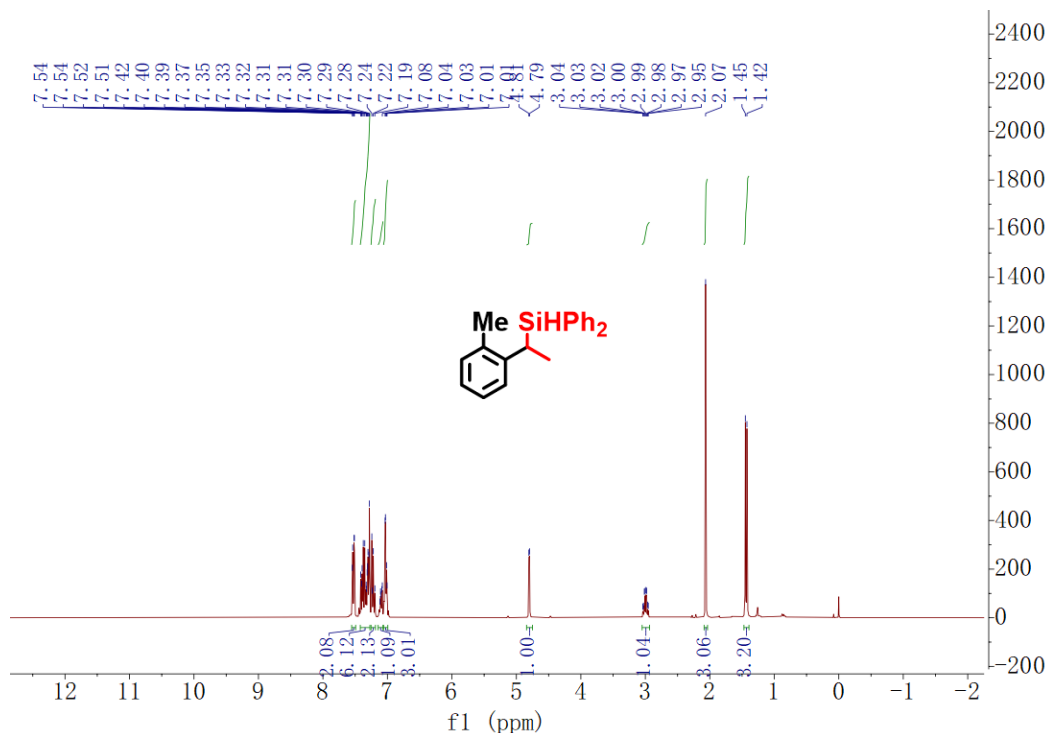

Fig.S12  $^1\text{H}$  NMR of **4b** ( $\text{CDCl}_3$ )

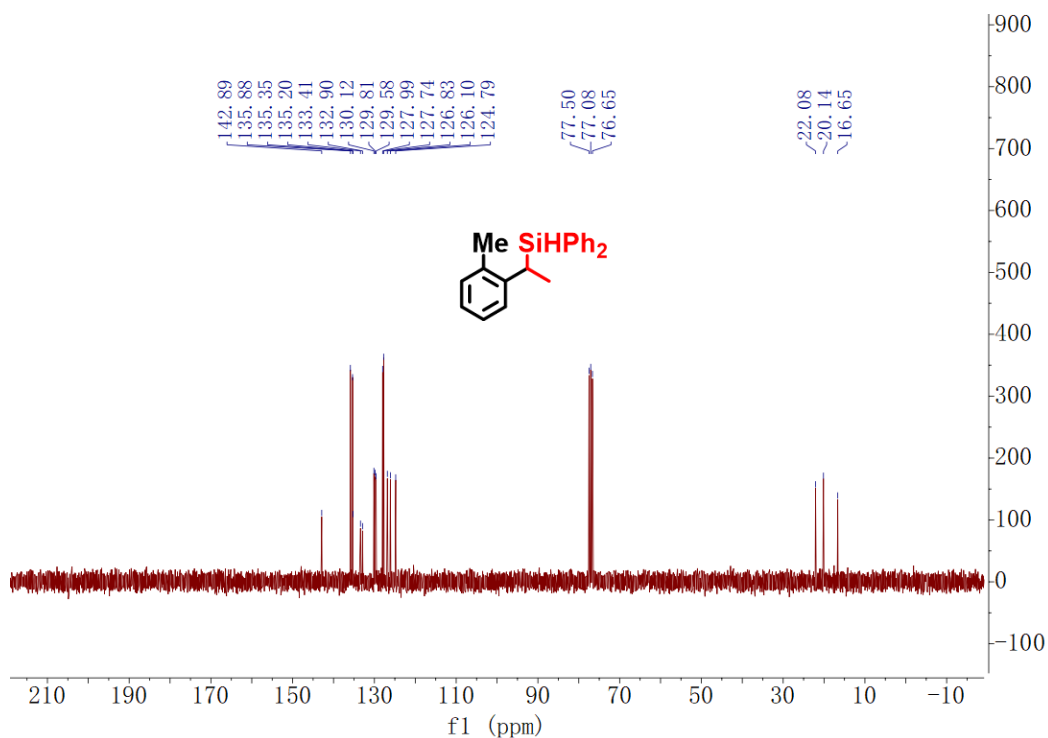

Fig.S13  $^{13}\text{C}$  NMR of **4b** ( $\text{CDCl}_3$ )



### Diphenyl(1-(*m*-tolyl)ethyl)silane (**4c**)

$^1\text{H}$  NMR (300 MHz,  $\text{CDCl}_3$ )  $\delta$  7.54 – 7.45 (m, 2H), 7.37 – 7.27 (m, 6H), 7.24 (t,  $J = 7.0$  Hz, 2H), 7.05 (td,  $J = 7.5, 3.5$  Hz, 1H), 6.88 (d,  $J = 7.4$  Hz, 1H), 6.83 – 6.74 (m, 2H), 4.83 (d,  $J = 3.2$  Hz, 1H), 2.77 (qd,  $J = 7.5, 3.6$  Hz, 1H), 2.20 (s, 3H), 1.44 (d,  $J = 7.5$  Hz, 3H).  $^{13}\text{C}$  NMR (75 MHz,  $\text{CDCl}_3$ )  $\delta$  144.27, 137.63, 135.83, 135.69, 133.24, 129.77, 129.63, 128.75, 128.14, 127.97, 127.77, 125.78, 124.81, 77.55, 77.12, 76.70, 26.93, 21.50, 16.59.

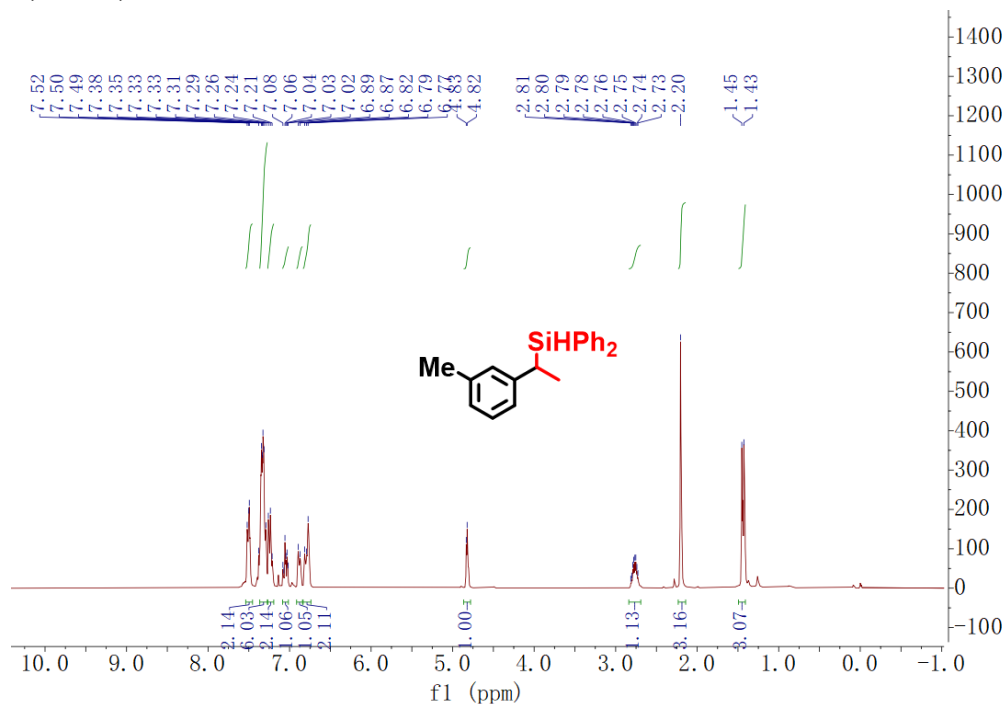

Fig.S14  $^1\text{H}$  NMR of **4c** ( $\text{CDCl}_3$ )

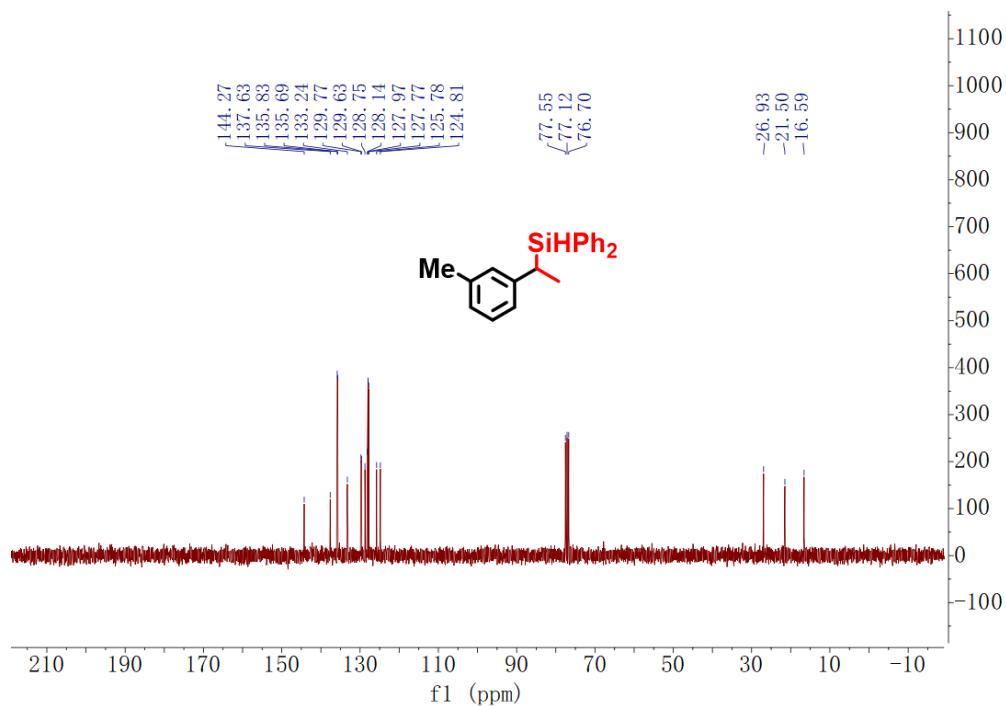

Fig.S15  $^{13}\text{C}$  NMR of **4c** ( $\text{CDCl}_3$ )

**(1-(4-(tert-butyl)phenyl)ethyl)diphenylsilane (4e)**

$^1\text{H}$  NMR (300 MHz,  $\text{CDCl}_3$ )  $\delta$  7.51 (dd,  $J = 7.8, 1.7$  Hz, 2H), 7.39 – 7.28 (m, 6H), 7.24 (d,  $J = 5.9$  Hz, 2H), 7.21 – 7.16 (m, 2H), 6.94 (d,  $J = 8.3$  Hz, 2H), 4.83 (d,  $J = 3.3$  Hz, 1H), 2.79 (qd,  $J = 7.5, 3.4$  Hz, 1H), 1.45 (d,  $J = 7.5$  Hz, 3H), 1.28 (s, 9H).  $^{13}\text{C}$  NMR (75 MHz,  $\text{CDCl}_3$ )  $\delta$  147.77, 141.17, 135.81, 135.65, 133.35, 133.30, 129.71, 129.54, 127.95, 127.72, 127.37, 125.10, 77.93, 77.09, 76.67, 34.34, 31.52, 26.33, 16.58.

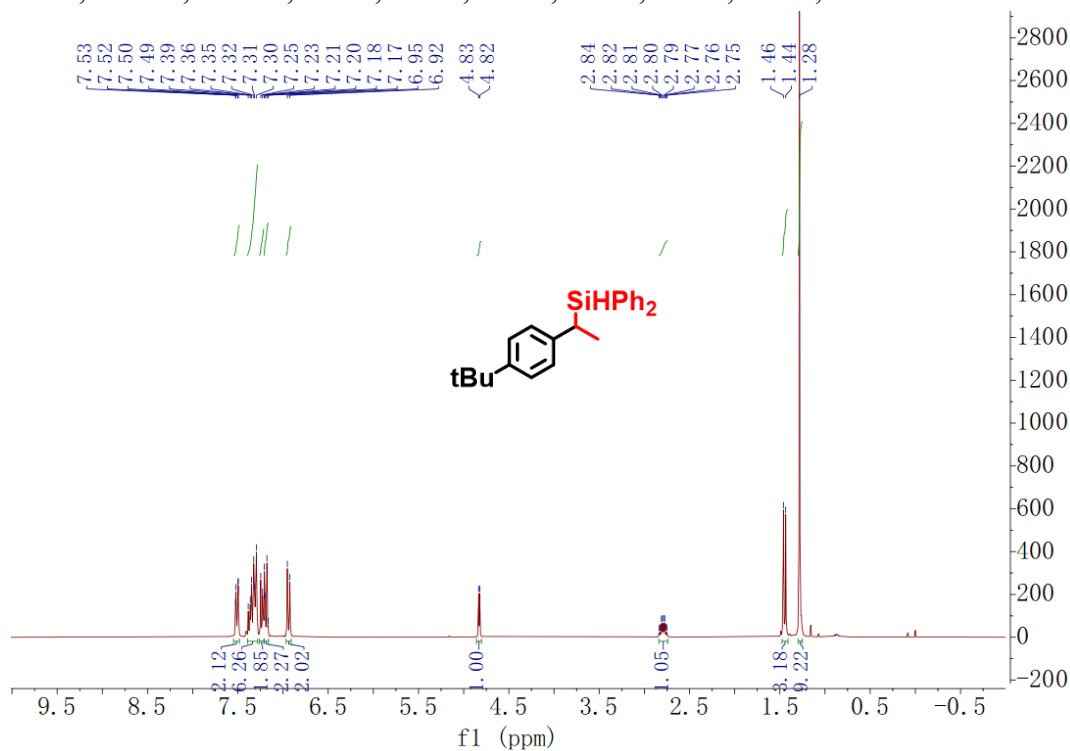

Fig.S16  $^1\text{H}$  NMR of **4e** ( $\text{CDCl}_3$ )

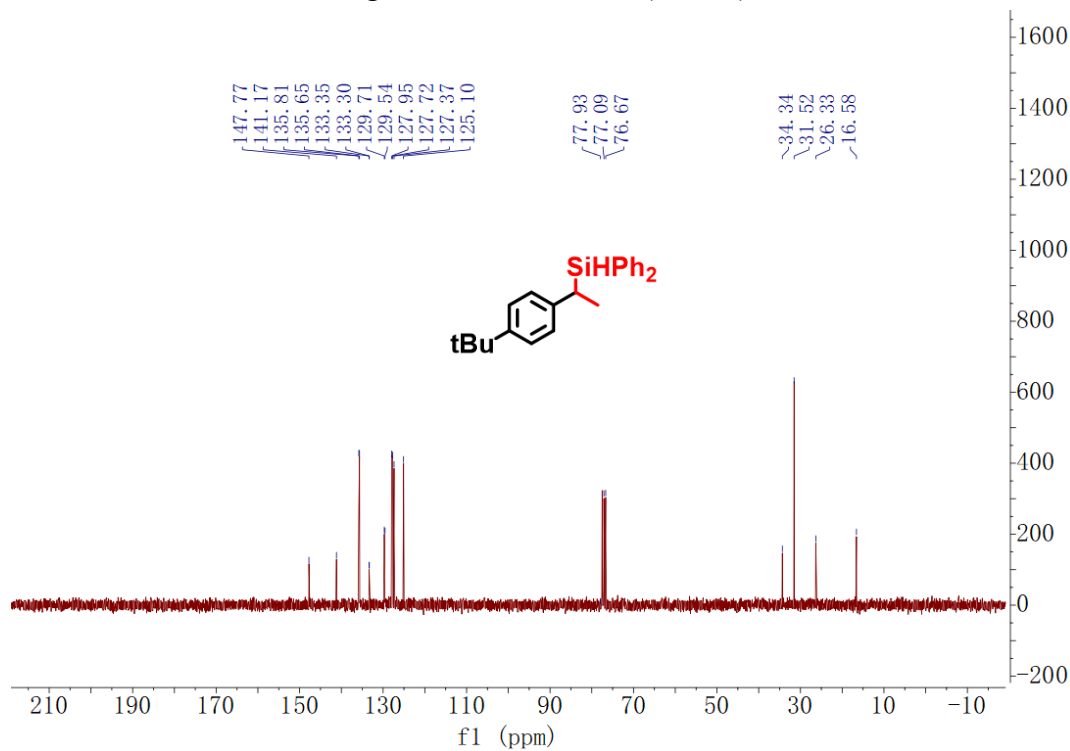

Fig.S17  $^{13}\text{C}$  NMR of **4e** ( $\text{CDCl}_3$ )

**(1-(4-methoxyphenyl)ethyl)diphenylsilane (4f)**

$^1\text{H}$  NMR (300 MHz,  $\text{CDCl}_3$ )  $\delta$  7.51 (dd,  $J = 7.7, 1.7$  Hz, 2H), 7.38 – 7.29 (m, 6H), 7.25 (t,  $J = 6.9$  Hz, 2H), 6.92 (d,  $J = 8.7$  Hz, 2H), 6.73 (d,  $J = 8.7$  Hz, 2H), 4.83 (d,  $J = 3.4$  Hz, 1H), 3.73 (s, 3H), 2.76 (qd,  $J = 7.5, 3.4$  Hz, 1H), 1.42 (d,  $J = 7.6$  Hz, 3H).  $^{13}\text{C}$  NMR (75 MHz,  $\text{CDCl}_3$ )  $\delta$  157.21, 136.36, 135.78, 135.66, 133.31, 133.26, 129.73, 129.60, 128.62, 127.98, 127.80, 113.74, 77.54, 77.11, 76.69, 55.27, 25.89, 16.94.

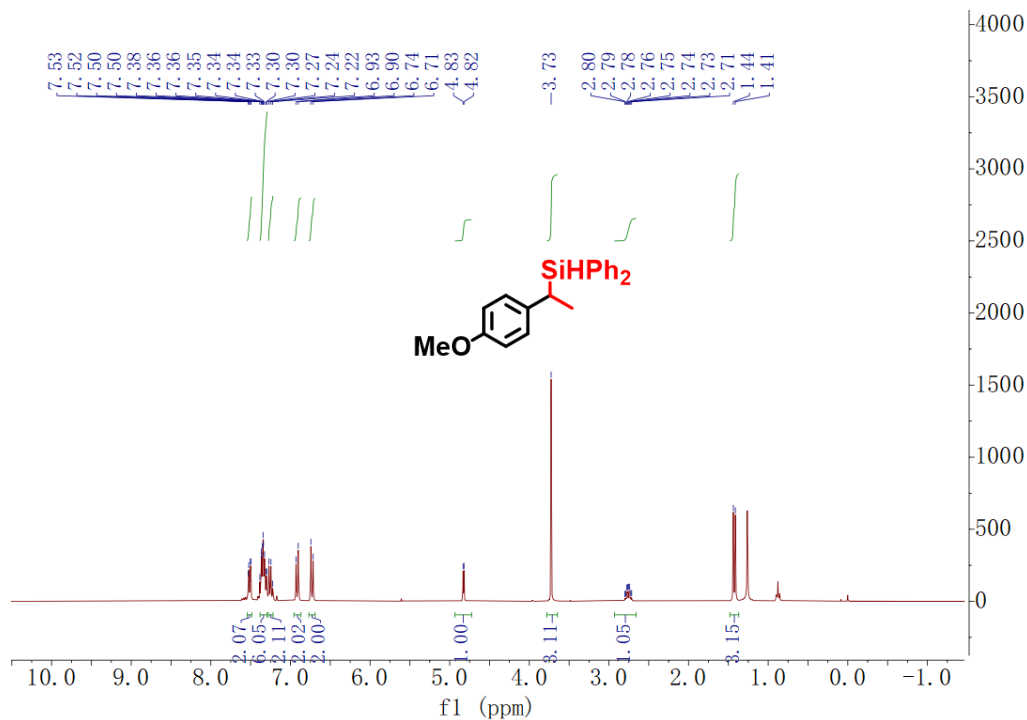

Fig.S18  $^1\text{H}$  NMR of **4f** ( $\text{CDCl}_3$ )

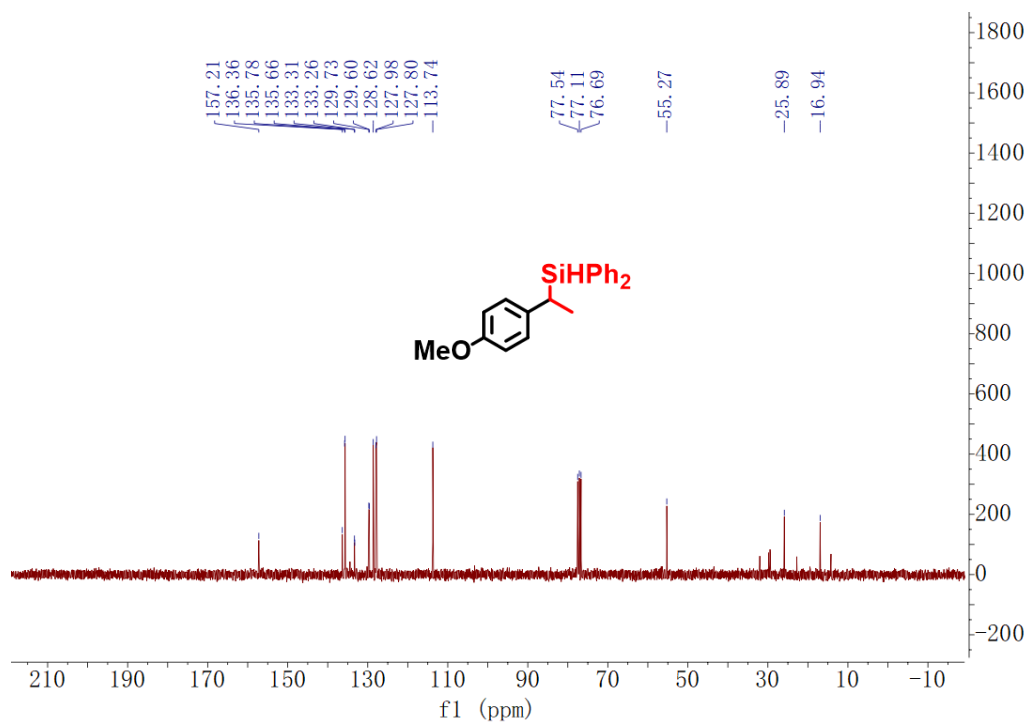

Fig.S19  $^{13}\text{C}$  NMR of **4f** ( $\text{CDCl}_3$ )

**(1-(3-fluorophenyl)ethyl)diphenylsilane (4g)**

$^1\text{H}$  NMR (300 MHz,  $\text{CDCl}_3$ )  $\delta$  7.59 – 7.52 (m, 2H), 7.46 – 7.37 (m, 6H), 7.35 – 7.27 (m, 2H), 7.20 – 7.10 (m, 1H), 6.84 – 6.69 (m, 3H), 4.86 (d,  $J = 3.3$  Hz, 1H), 2.87 (qd,  $J = 7.5, 3.3$  Hz, 1H), 1.48 (d,  $J = 7.5$  Hz, 3H).  $^{13}\text{C}$  NMR (75 MHz,  $\text{CDCl}_3$ )  $\delta$  135.66, 135.50, 132.58, 129.89, 129.77, 129.47, 128.02, 127.84, 114.50, 114.22, 111.84, 77.46, 77.03, 76.61, 27.10, 16.30.

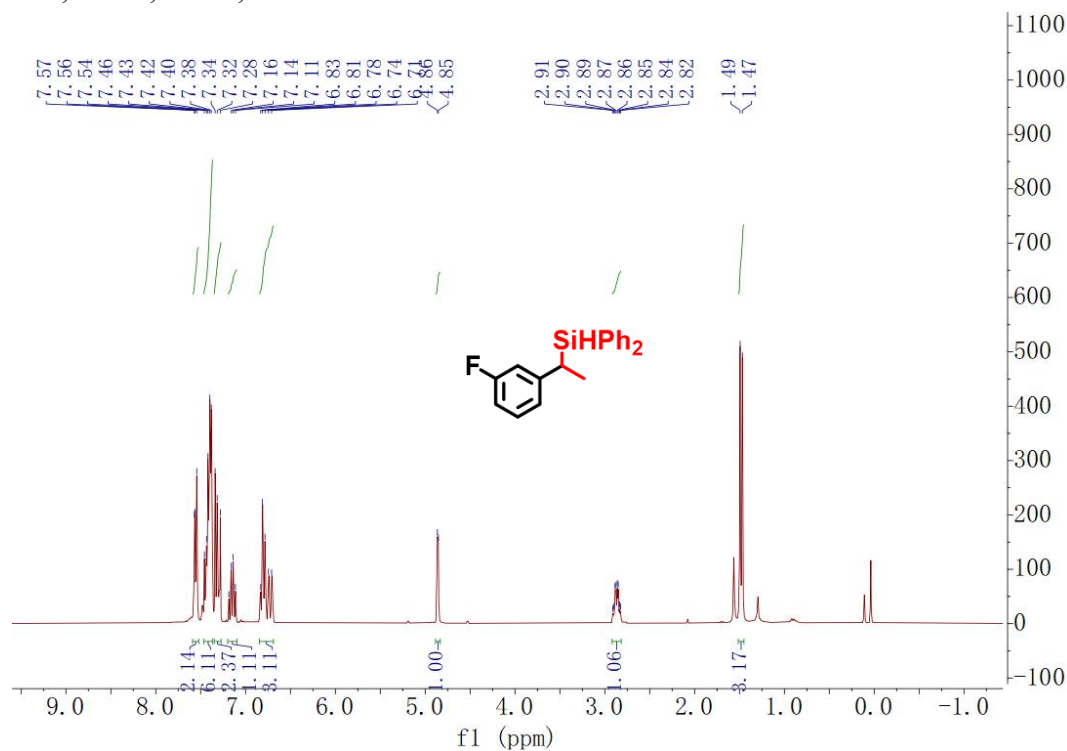

Fig.S20  $^1\text{H}$  NMR of **4g** ( $\text{CDCl}_3$ )

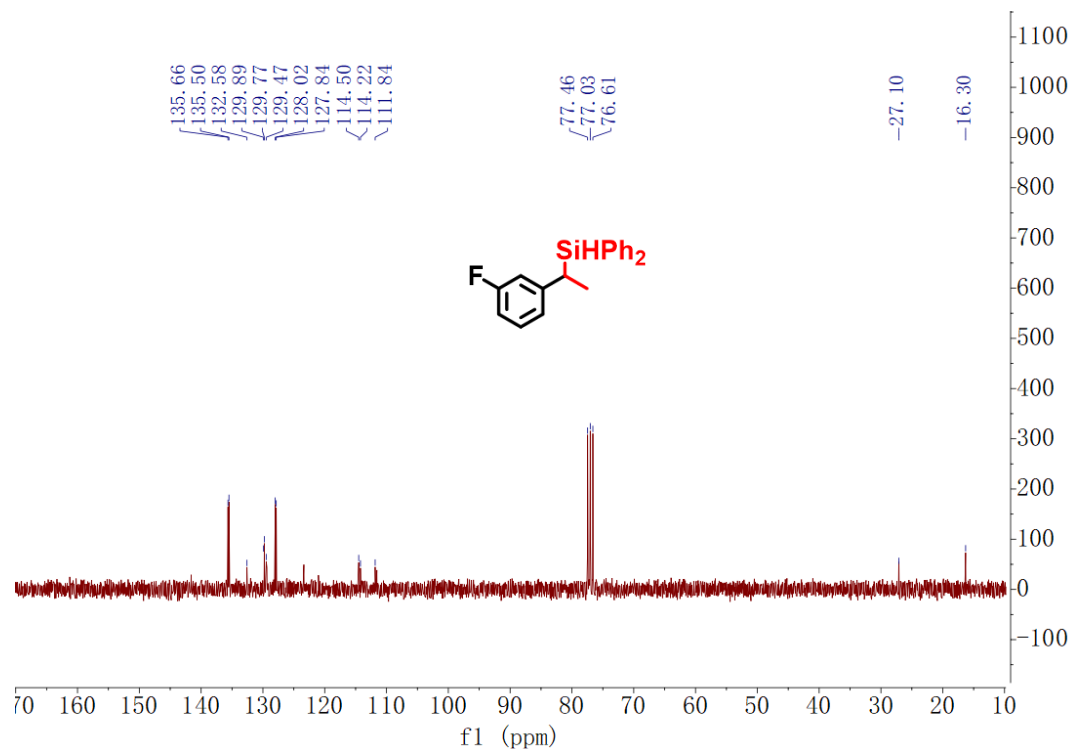

Fig.S21  $^{13}\text{C}$  NMR of **4g** ( $\text{CDCl}_3$ )

**(1-(4-fluorophenyl)ethyl)diphenylsilane (4h)**

$^1\text{H}$  NMR (300 MHz,  $\text{CDCl}_3$ )  $\delta$  7.51 (dd,  $J = 7.8, 1.7$  Hz, 2H), 7.36 (dd,  $J = 12.5, 5.2$  Hz, 6H), 7.30 – 7.23 (m, 2H), 6.94 – 6.81 (m, 4H), 4.81 (d,  $J = 3.4$  Hz, 1H), 2.80 (qd,  $J = 7.5, 3.4$  Hz, 1H), 1.44 (d,  $J = 7.5$  Hz, 3H).  $^{13}\text{C}$  NMR (75 MHz,  $\text{CDCl}_3$ )  $\delta$  135.67, 135.53, 132.79, 129.82, 129.69, 128.90, 128.80, 127.99, 127.81, 115.02, 114.74, 77.45, 77.03, 76.61, 26.22, 16.69.

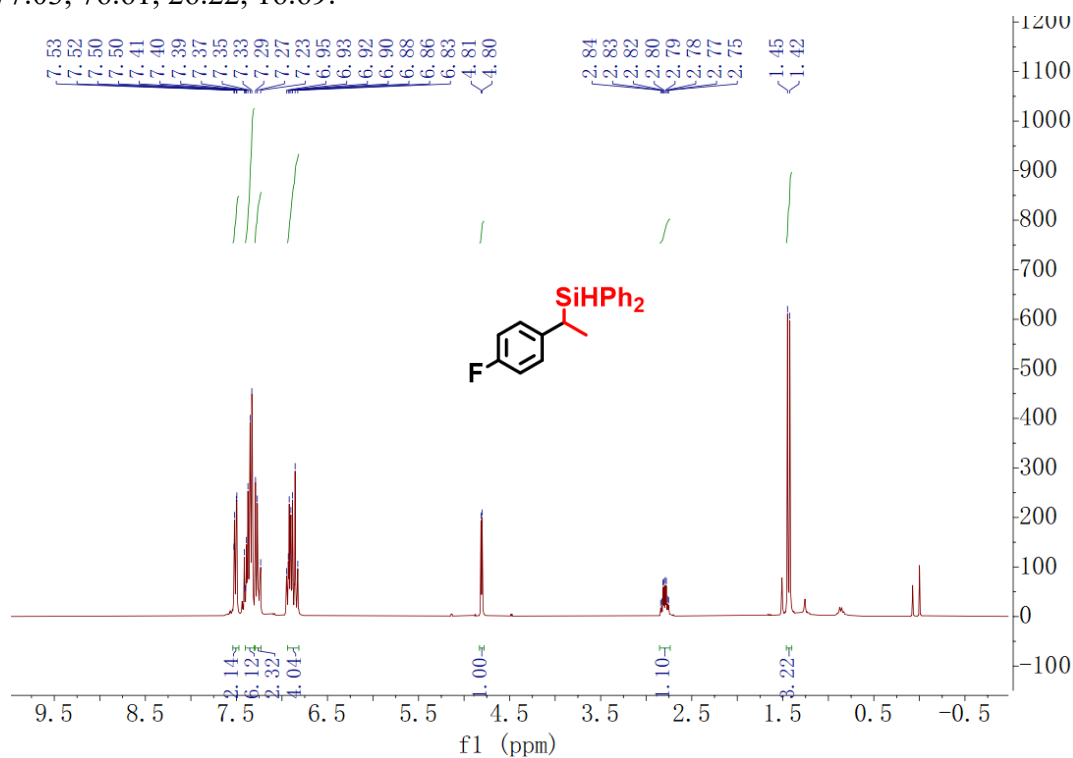

Fig.S22  $^1\text{H}$  NMR of **4h** ( $\text{CDCl}_3$ )

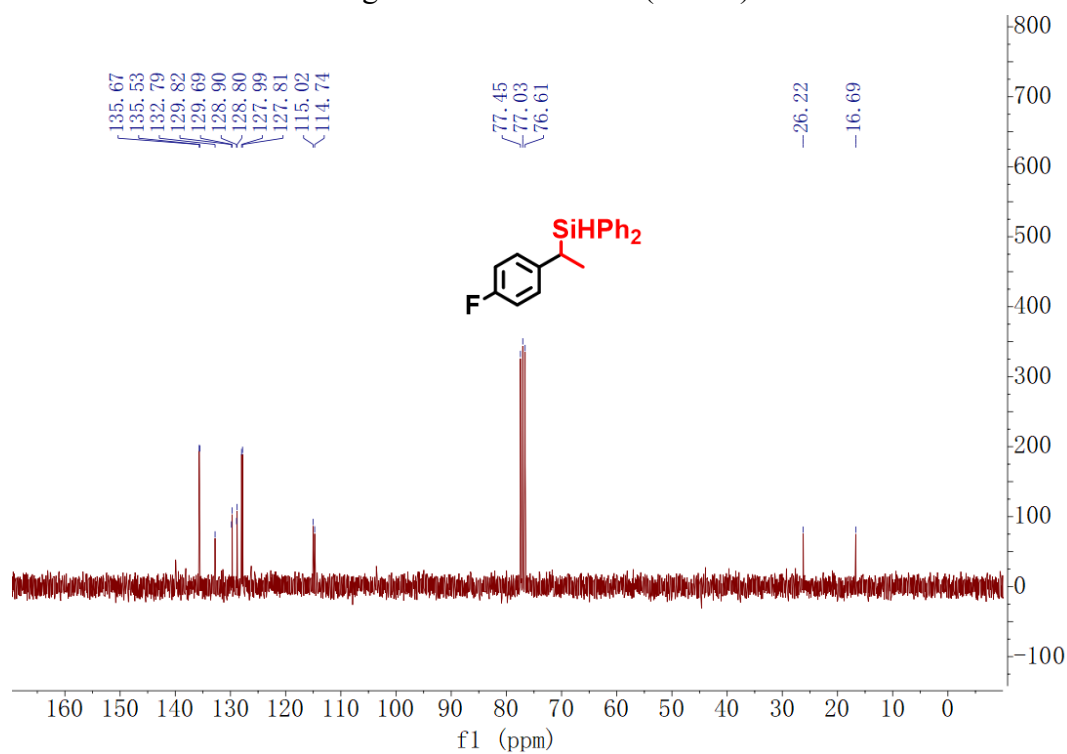

Fig.S23  $^{13}\text{C}$  NMR of **4h** ( $\text{CDCl}_3$ )

**(1-(3-chlorophenyl)ethyl)diphenylsilane (4i)**

$^1\text{H}$  NMR (300 MHz,  $\text{CDCl}_3$ )  $\delta$  7.55 – 7.48 (m, 2H), 7.30 (dt,  $J = 24.5, 7.5$  Hz, 8H), 7.08 – 7.02 (m, 2H), 6.96 (s, 1H), 6.88 – 6.79 (m, 1H), 4.82 (d,  $J = 2.7$  Hz, 1H), 2.78 (qd,  $J = 7.2, 2.7$  Hz, 1H), 1.42 (d,  $J = 7.5$  Hz, 3H).  $^{13}\text{C}$  NMR (75 MHz,  $\text{CDCl}_3$ )  $\delta$  146.70, 135.74, 135.59, 135.22, 134.06, 132.54, 130.00, 129.89, 129.37, 128.20, 128.11, 127.94, 127.79, 125.96, 125.13, 77.55, 77.13, 76.71, 27.11, 16.32.

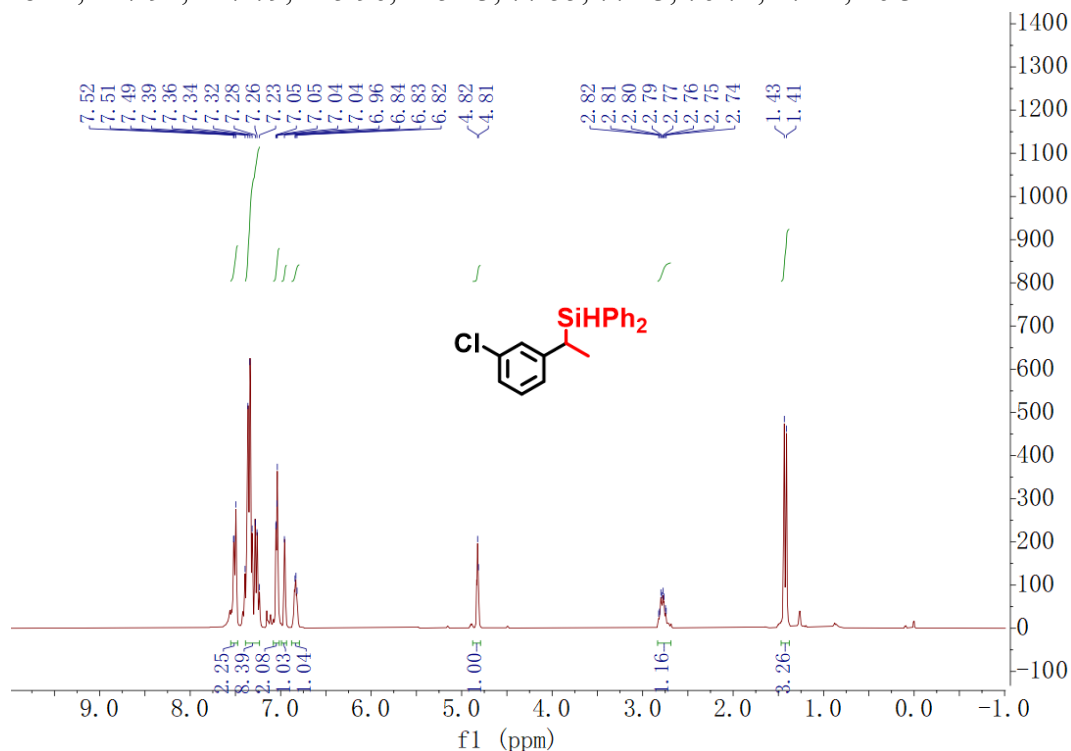

Fig.S24  $^1\text{H}$  NMR of **4i** ( $\text{CDCl}_3$ )

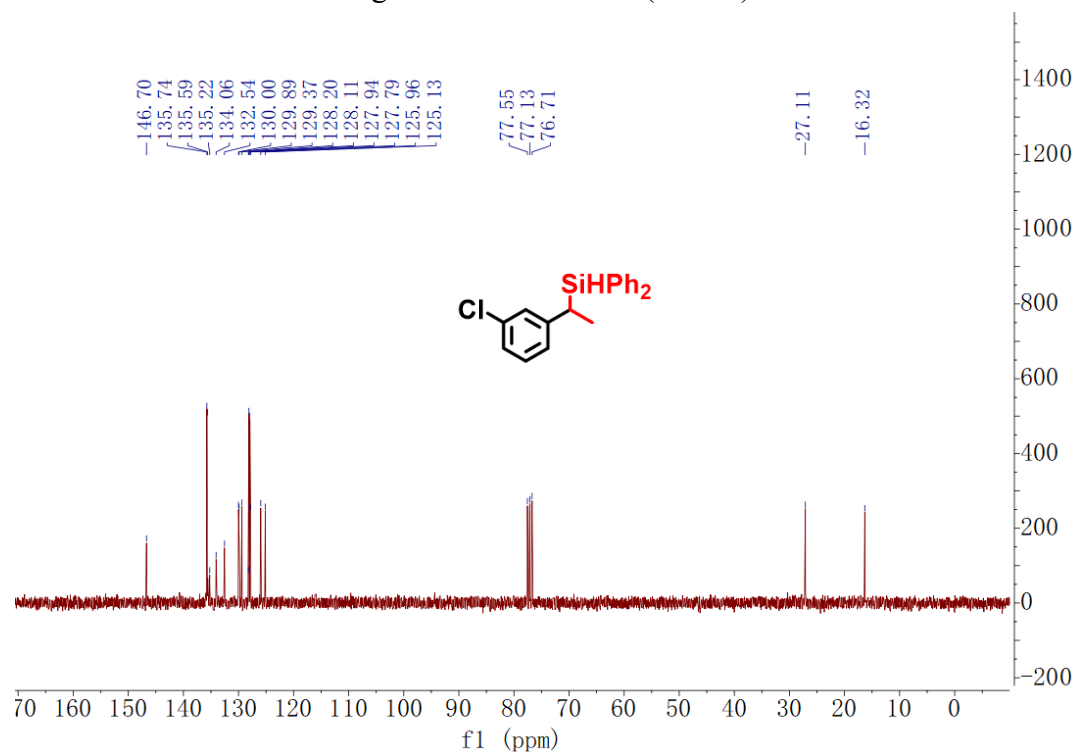

Fig.S25  $^{13}\text{C}$  NMR of **4i** ( $\text{CDCl}_3$ )

**(1-(4-chlorophenyl)ethyl)diphenylsilane (4j)**

$^1\text{H}$  NMR (300 MHz,  $\text{CDCl}_3$ )  $\delta$  7.45 – 7.39 (m, 2H), 7.38 – 7.23 (m, 8H), 7.05 (d,  $J$  = 8.4 Hz, 2H), 6.82 (d,  $J$  = 8.5 Hz, 2H), 4.73 (d,  $J$  = 3.3 Hz, 1H), 2.72 (tt,  $J$  = 7.5, 3.7 Hz, 1H), 1.35 (d,  $J$  = 7.5 Hz, 3H).  $^{13}\text{C}$  NMR (75 MHz,  $\text{CDCl}_3$ )  $\delta$  143.60, 135.66, 135.52, 129.87, 129.76, 128.94, 128.21, 128.01, 127.85, 77.45, 77.03, 76.60, 26.57, 16.41.

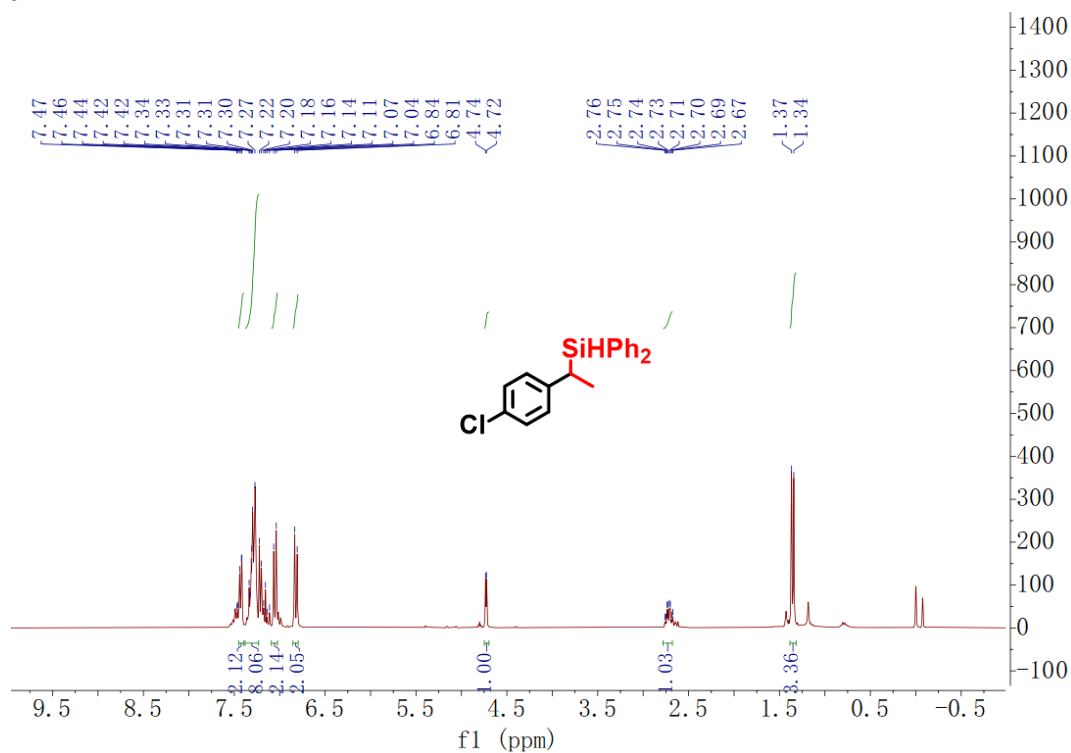

Fig.S26  $^1\text{H}$  NMR of **4j** ( $\text{CDCl}_3$ )

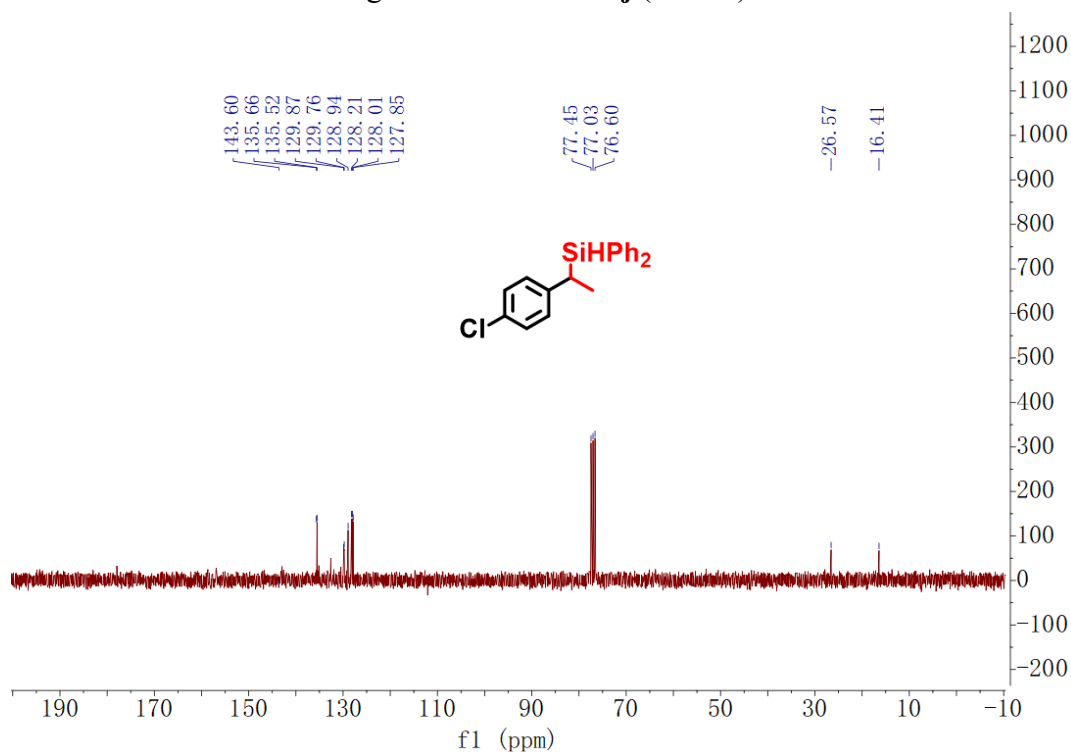

Fig.S27  $^{13}\text{C}$  NMR of **4j** ( $\text{CDCl}_3$ )

**(1-(4-Bromophenyl)ethyl)diphenylsilane (4k)**

$^1\text{H}$  NMR (300 MHz,  $\text{CDCl}_3$ )  $\delta$  7.53 – 7.46 (m, 2H), 7.37 – 7.31 (m, 6H), 7.27 (dd,  $J = 7.9, 3.2$  Hz, 4H), 6.83 (d,  $J = 8.4$  Hz, 2H), 4.81 (d,  $J = 3.3$  Hz, 1H), 2.77 (qd,  $J = 7.5, 3.3$  Hz, 1H), 1.42 (d,  $J = 7.4$  Hz, 3H).  $^{13}\text{C}$  NMR (75 MHz,  $\text{CDCl}_3$ )  $\delta$  143.53, 135.72, 135.58, 135.20, 132.60, 131.20, 129.94, 129.84, 129.43, 128.08, 127.93, 118.52, 77.11, 76.69, 26.70, 16.41.

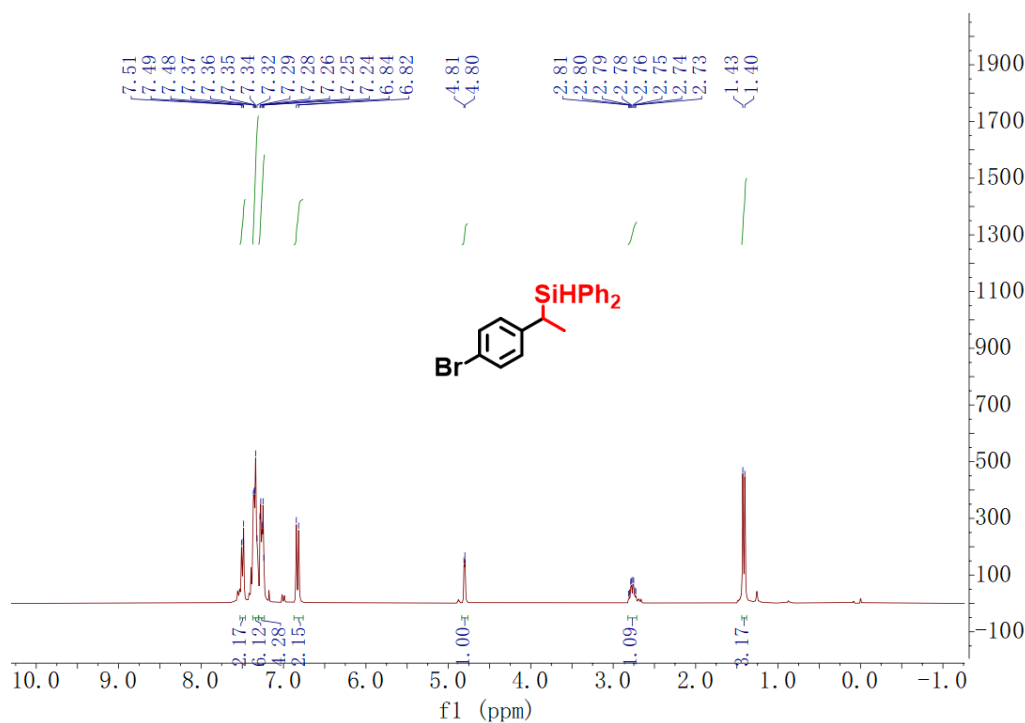

Fig.S28  $^1\text{H}$  NMR of **4k** ( $\text{CDCl}_3$ )

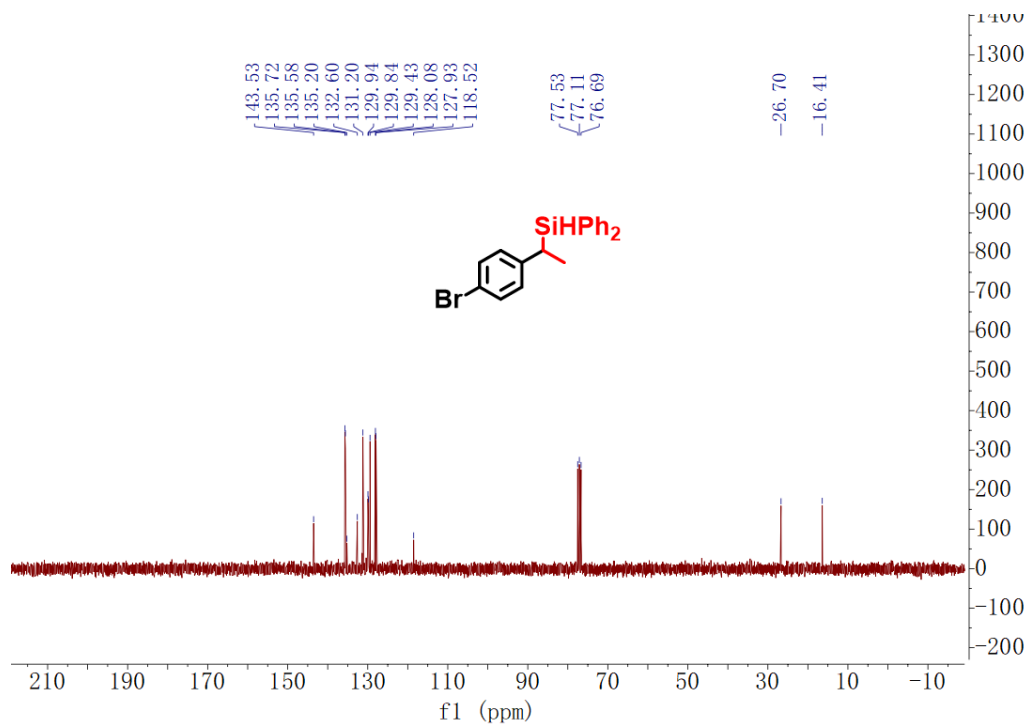

Fig.S29  $^{13}\text{C}$  NMR of **4k** ( $\text{CDCl}_3$ )



### Diphenyl(1-(3-(trifluoromethyl)phenyl)ethyl)silane (**4I**)

$^1\text{H}$  NMR (300 MHz,  $\text{CDCl}_3$ )  $\delta$  7.53 – 7.46 (m, 2H), 7.34 (dt,  $J = 7.6, 3.9$  Hz, 7H), 7.29 – 7.21 (m, 3H), 7.13 (d,  $J = 8.6$  Hz, 2H), 4.82 (d,  $J = 3.1$  Hz, 1H), 2.88 (qd,  $J = 7.5, 3.2$  Hz, 1H), 1.47 (d,  $J = 7.4$  Hz, 3H).  $^{13}\text{C}$  NMR (75 MHz,  $\text{CDCl}_3$ )  $\delta$  145.43, 135.66, 135.52, 132.25, 130.92, 130.03, 129.92, 128.49, 128.11, 127.94, 124.39, 121.74, 121.69, 78.03, 77.06, 76.64, 27.33, 16.09.

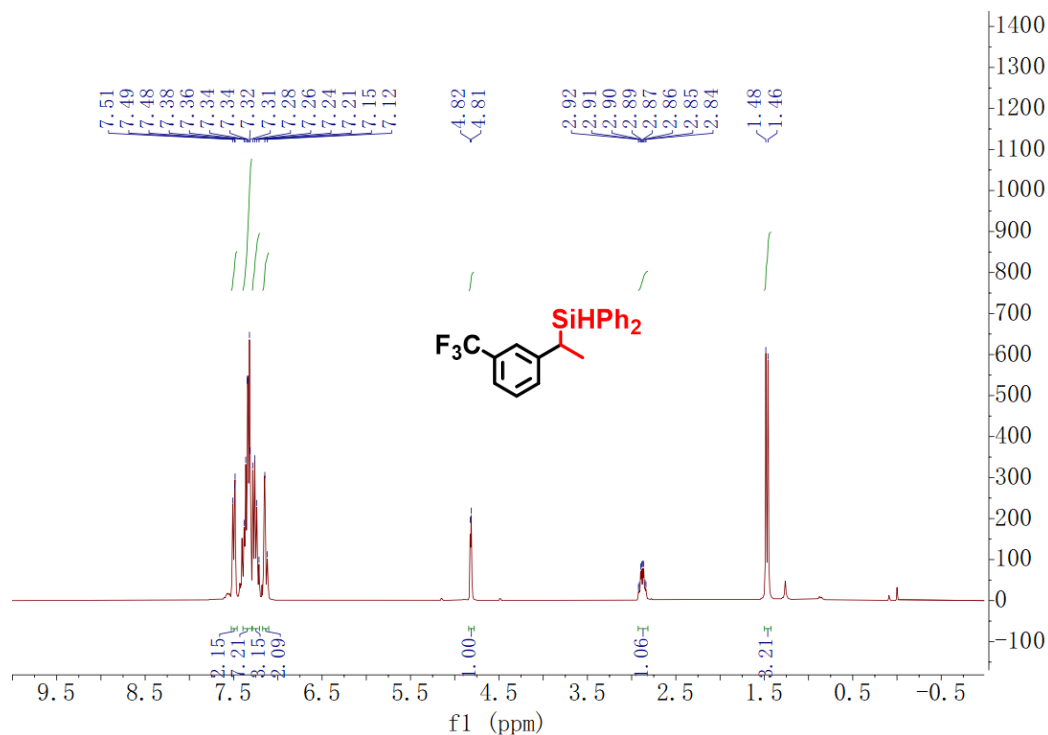

Fig.S30  $^1\text{H}$  NMR of **4I** ( $\text{CDCl}_3$ )

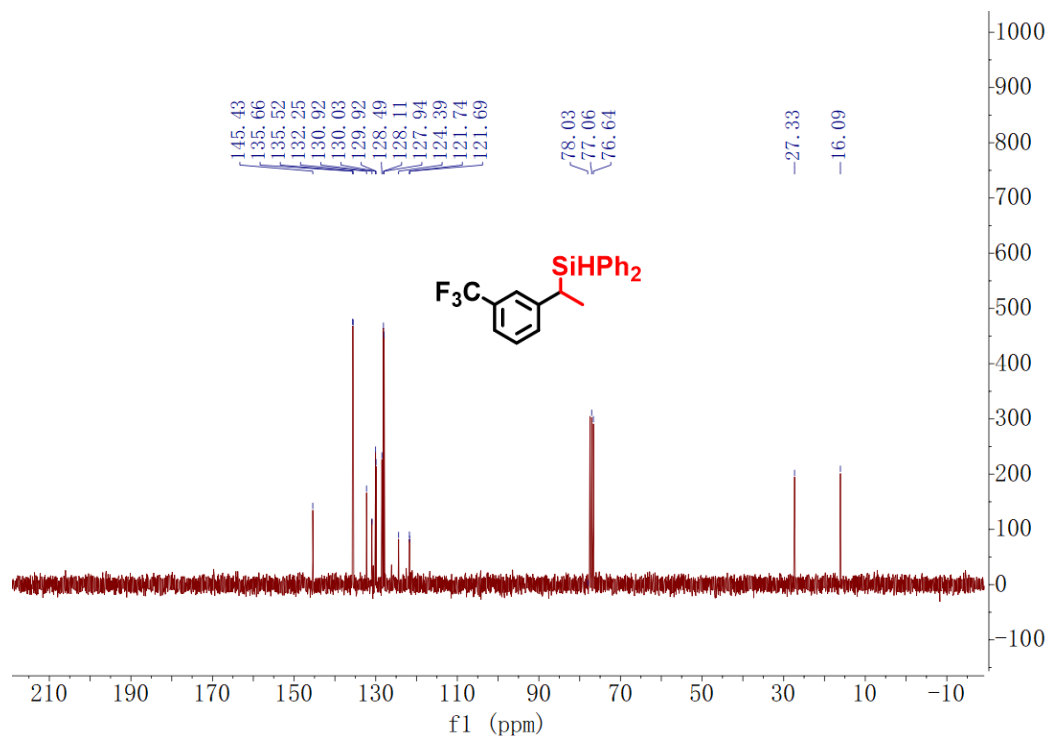

Fig.S31  $^{13}\text{C}$  NMR of **4I** ( $\text{CDCl}_3$ )

### Diphenyl(1-(4-(trifluoromethyl)phenyl)ethyl)silane (**4m**)

$^1\text{H}$  NMR (300 MHz,  $\text{CDCl}_3$ )  $\delta$  7.51 (dd,  $J = 7.8, 1.6$  Hz, 2H), 7.43 – 7.33 (m, 8H), 7.27 (dd,  $J = 7.9, 6.5$  Hz, 2H), 7.06 (d,  $J = 8.1$  Hz, 2H), 4.82 (d,  $J = 3.2$  Hz, 1H), 2.90 (qd,  $J = 7.5, 3.2$  Hz, 1H), 1.47 (d,  $J = 7.4$  Hz, 3H).  $^{13}\text{C}$  NMR (75 MHz,  $\text{CDCl}_3$ )  $\delta$  148.93, 135.72, 135.54, 132.35, 132.31, 130.06, 129.94, 128.13, 127.97, 127.86, 125.11, 125.06, 77.51, 77.09, 76.66, 27.49, 16.17.

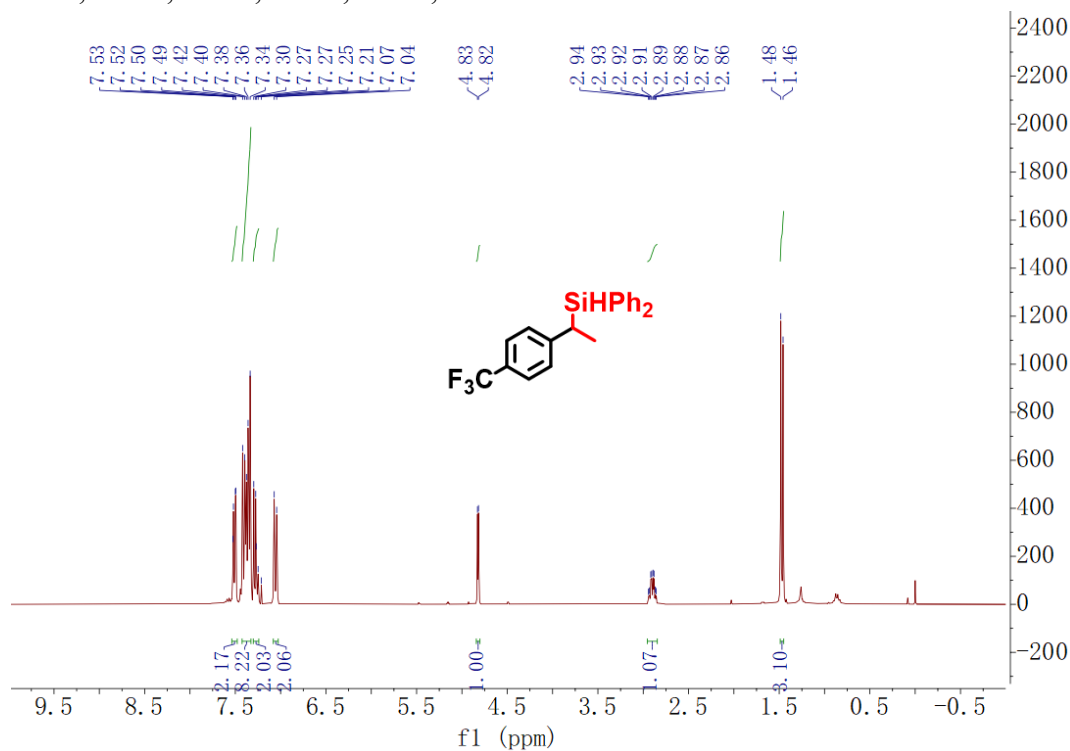

Fig.S32  $^1\text{H}$  NMR of **4m** ( $\text{CDCl}_3$ )

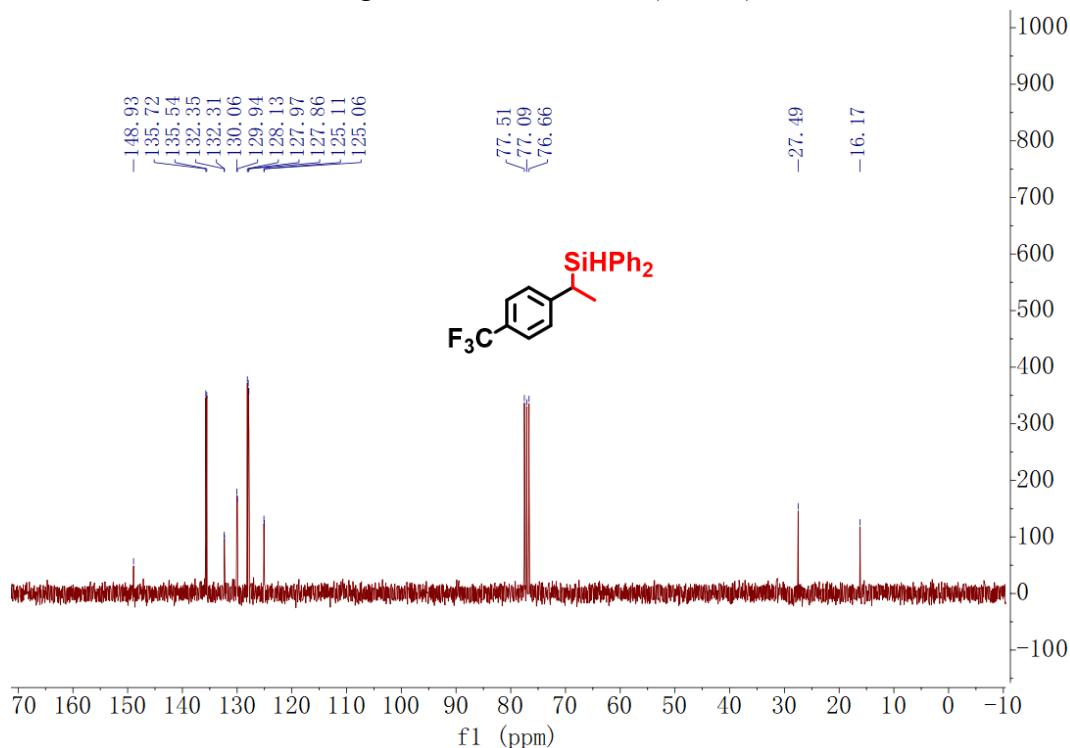

Fig.S33  $^{13}\text{C}$  NMR of **4m** ( $\text{CDCl}_3$ )

**(1-([1,1'-biphenyl]-4-yl)ethyl)diphenylsilane (3n)**

$^1\text{H}$  NMR (300 MHz,  $\text{CDCl}_3$ )  $\delta$  7.60 – 7.51 (m, 4H), 7.45 – 7.24 (m, 13H), 7.07 (d,  $J$  = 8.3 Hz, 2H), 4.86 (d,  $J$  = 3.3 Hz, 1H), 2.87 (qd,  $J$  = 7.5, 3.3 Hz, 1H), 1.49 (d,  $J$  = 7.5 Hz, 3H).  $^{13}\text{C}$  NMR (75 MHz,  $\text{CDCl}_3$ )  $\delta$  143.66, 141.15, 137.77, 135.83, 135.69, 133.02, 129.86, 129.73, 128.79, 128.18, 128.05, 127.87, 126.94, 126.90, 77.56, 77.13, 76.71, 26.79, 16.56.

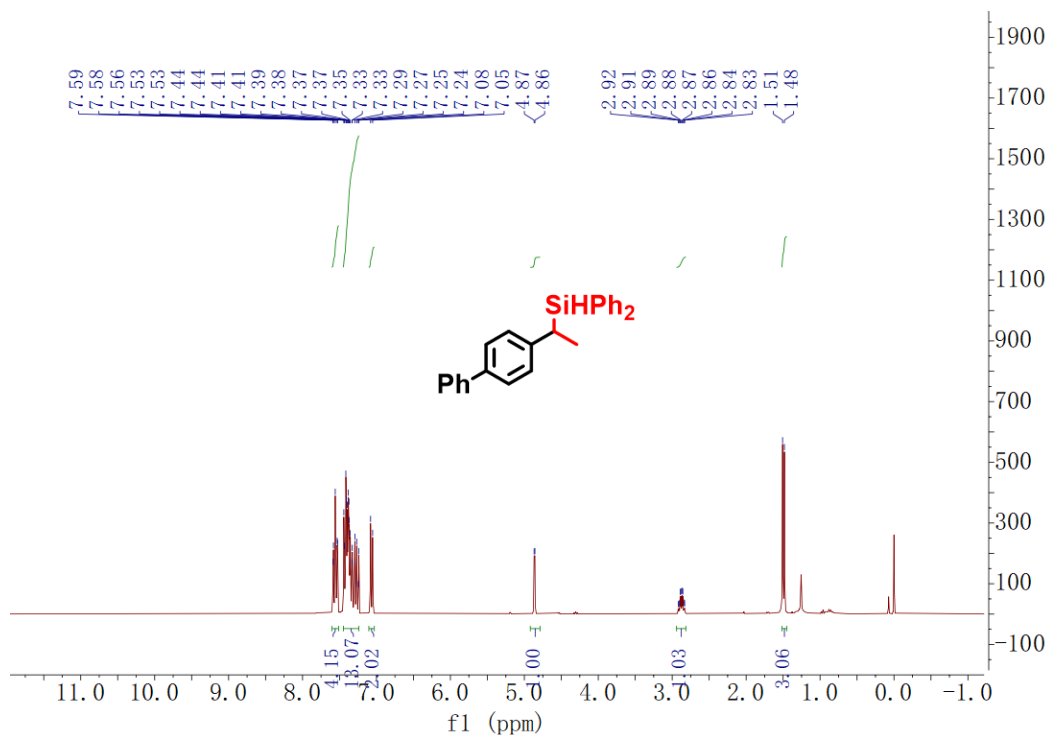

Fig.S34  $^1\text{H}$  NMR of **4n** ( $\text{CDCl}_3$ )

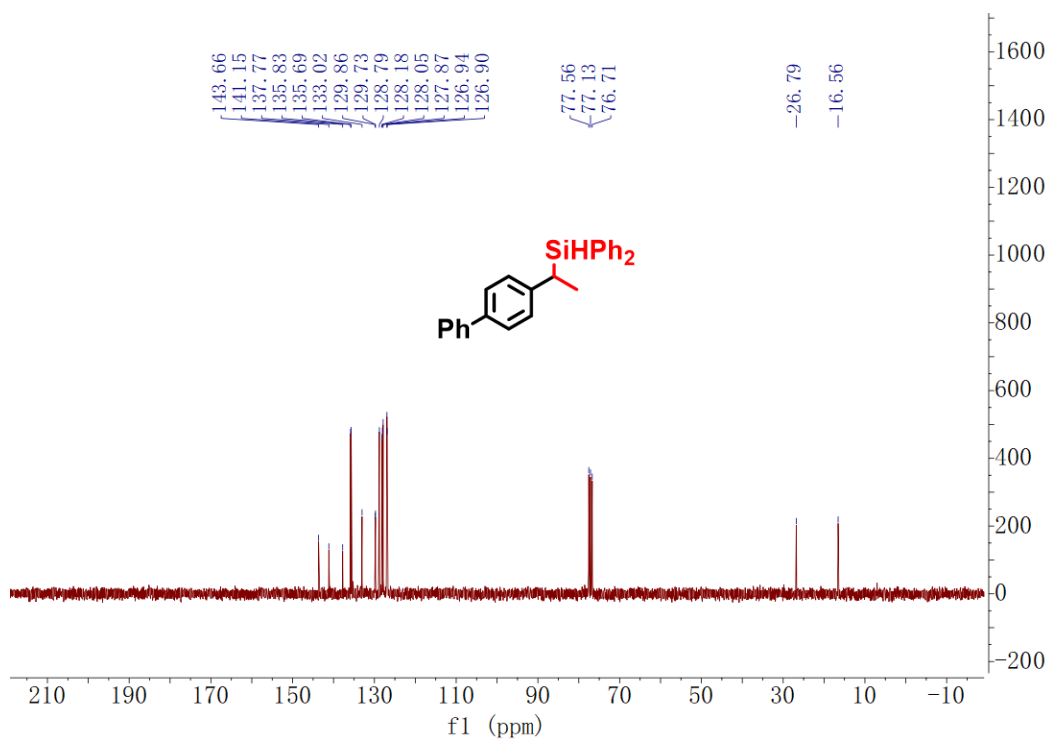

Fig.S35  $^{13}\text{C}$  NMR of **4n** ( $\text{CDCl}_3$ )

**(1-(naphthalen-2-yl)ethyl)diphenylsilane (4o)**

$^1\text{H}$  NMR (300 MHz,  $\text{CDCl}_3$ )  $\delta$  7.78 – 7.70 (m, 1H), 7.67 – 7.59 (m, 2H), 7.52 (d,  $J$  = 6.3 Hz, 2H), 7.43 – 7.29 (m, 9H), 7.26 – 7.19 (m, 2H), 7.14 (dd,  $J$  = 8.5, 1.8 Hz, 1H), 4.90 (d,  $J$  = 3.2 Hz, 1H), 2.99 (qd,  $J$  = 7.4, 3.1 Hz, 1H), 1.54 (d,  $J$  = 7.5 Hz, 3H).  $^{13}\text{C}$  NMR (75 MHz,  $\text{CDCl}_3$ )  $\delta$  142.14, 135.81, 135.66, 133.76, 133.02, 131.63, 129.82, 129.71, 128.00, 127.84, 127.61, 127.56, 127.40, 127.32, 125.81, 125.35, 124.82, 77.52, 77.10, 76.67, 27.30, 16.66.

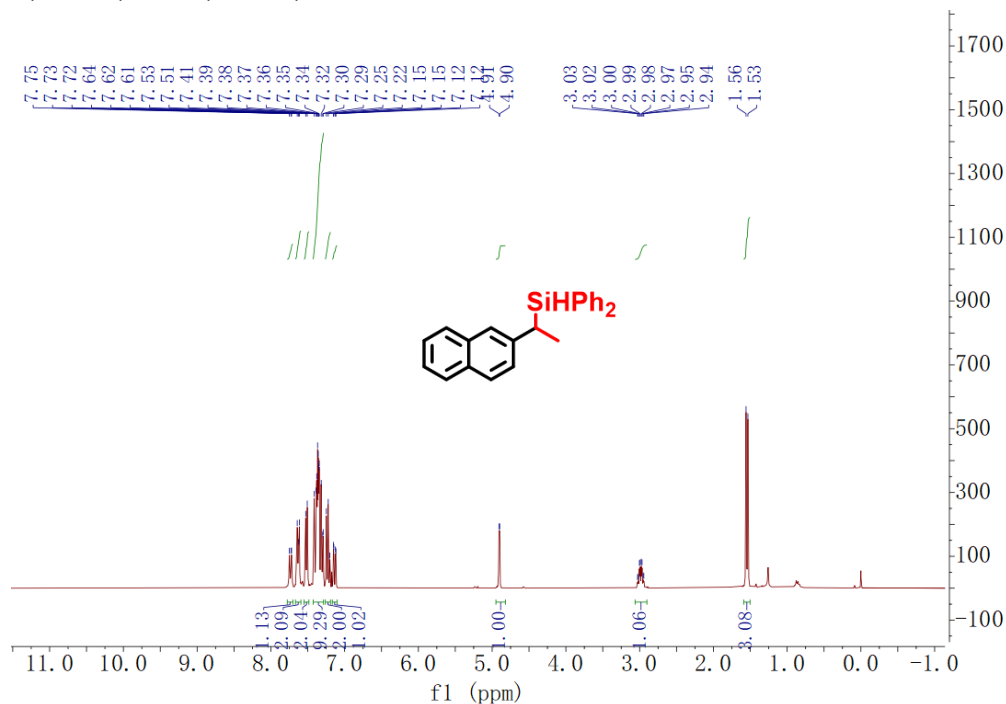

Fig.S36  $^1\text{H}$  NMR of **4o** ( $\text{CDCl}_3$ )

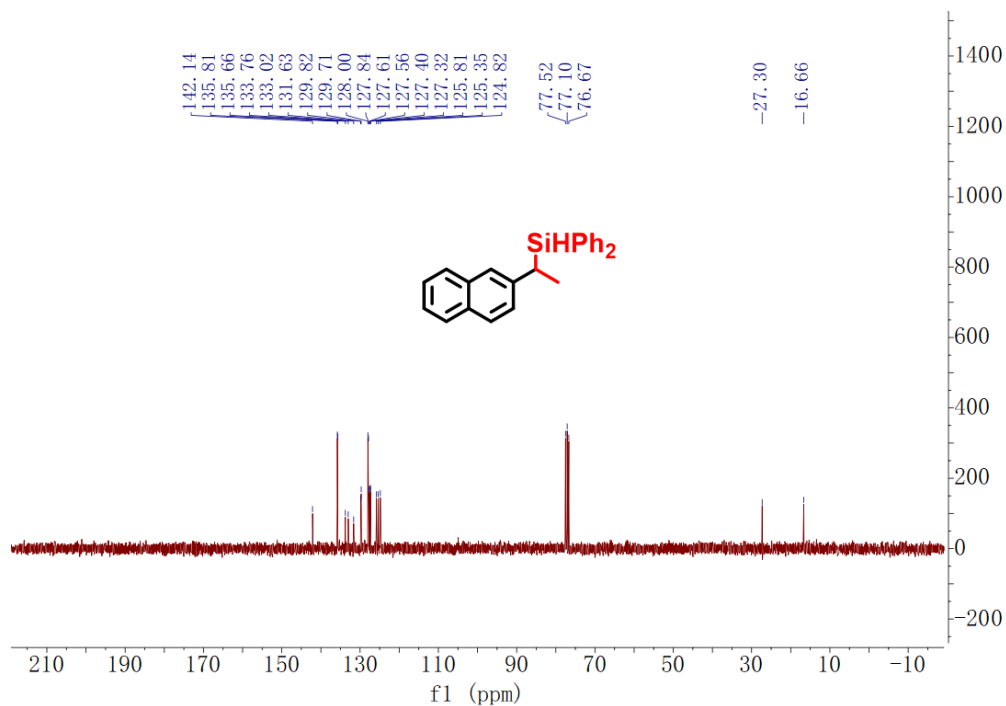

Fig.S37  $^{13}\text{C}$  NMR of **4o** ( $\text{CDCl}_3$ )

**(1-(thiophen-2-yl) ethyl)diphenylsilane (4p)**

$^1\text{H}$  NMR (300 MHz,  $\text{CDCl}_3$ )  $\delta$  7.54 (dd,  $J = 7.8, 1.7$  Hz, 2H), 7.45 – 7.28 (m, 8H), 6.99 (dd,  $J = 5.2, 1.2$  Hz, 1H), 6.84 (dd,  $J = 5.2, 3.5$  Hz, 1H), 6.58 (d,  $J = 3.5$  Hz, 1H), 4.91 (d,  $J = 3.2$  Hz, 1H), 3.12 (ddt,  $J = 10.3, 7.1, 3.2$  Hz, 1H), 1.50 (d,  $J = 7.5$  Hz, 3H).  $^{13}\text{C}$  NMR (75 MHz,  $\text{CDCl}_3$ )  $\delta$  145.56, 135.69, 135.59, 132.75, 129.88, 129.81, 128.01, 127.87, 126.73, 122.83, 121.81, 77.47, 77.05, 76.63, 22.29, 18.08, 5.72.

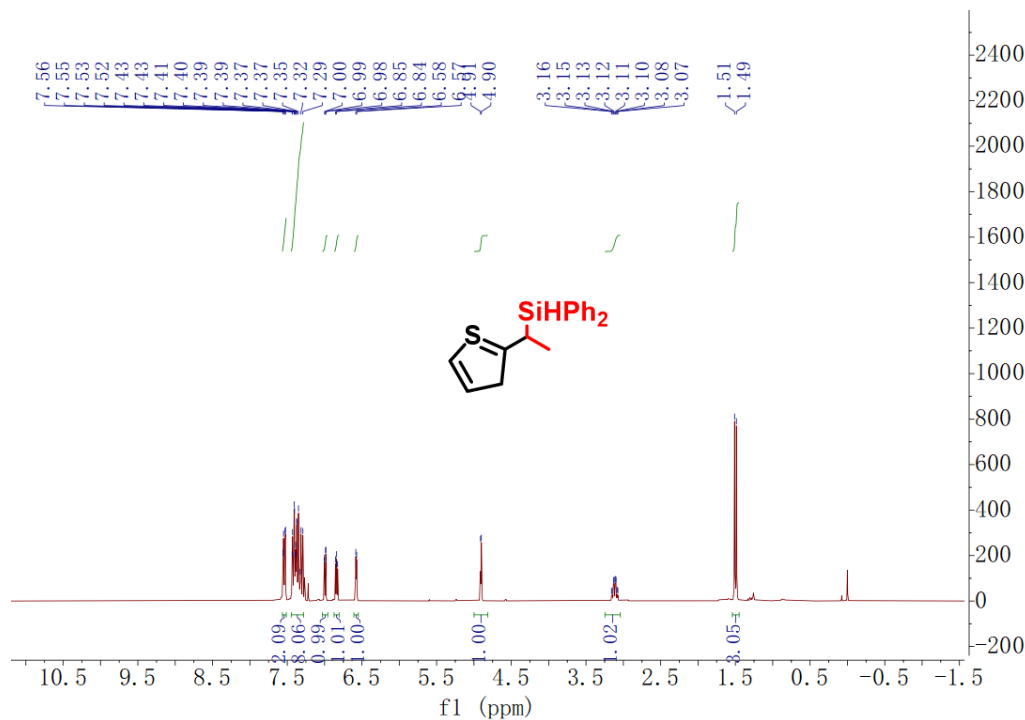

Fig.S38  $^1\text{H}$  NMR of 4p ( $\text{CDCl}_3$ )

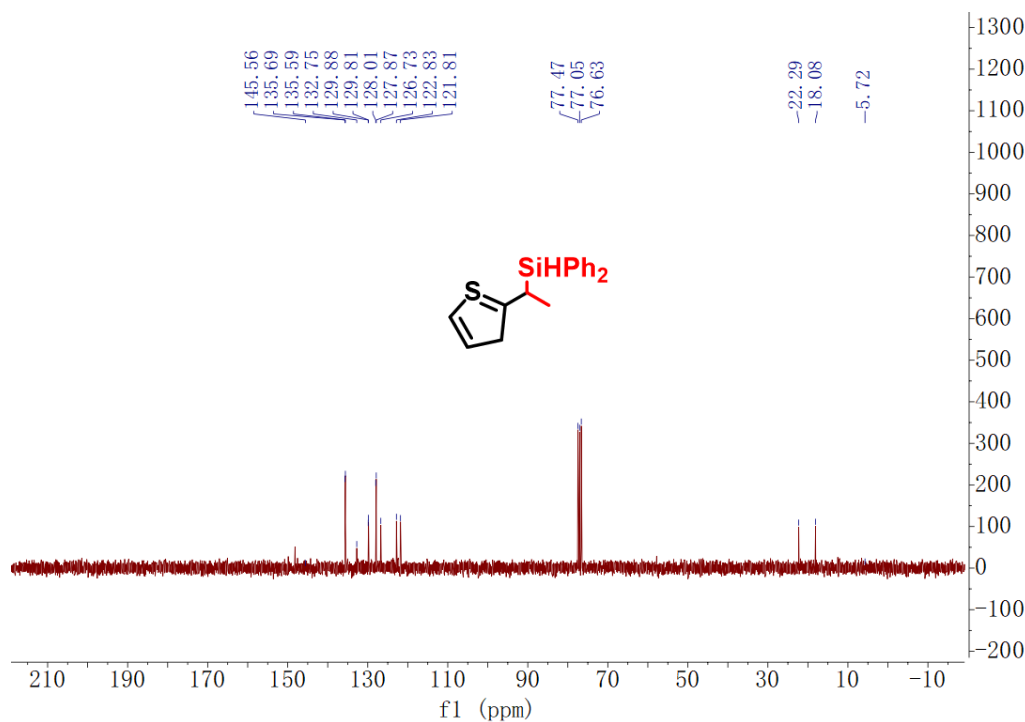

Fig.S39  $^{13}\text{C}$  NMR of 4p ( $\text{CDCl}_3$ )

### (n-Octyl)diphenylsilane (4q)

$^1\text{H}$  NMR (300 MHz,  $\text{CDCl}_3$ )  $\delta$  7.45 – 7.40 (m, 4H), 7.19 (dd,  $J = 5.7, 1.8$  Hz, 6H), 4.77 (t,  $J = 3.7$  Hz, 1H), 1.36 (t,  $J = 7.8$  Hz, 2H), 1.23 (d,  $J = 7.0$  Hz, 2H), 1.16 (s, 8H), 1.06 – 0.99 (m, 2H), 0.76 (d,  $J = 5.8$  Hz, 3H).  $^{13}\text{C}$  NMR (75 MHz,  $\text{CDCl}_3$ )  $\delta$  135.85, 135.31, 134.89, 129.60, 128.28, 128.10, 77.58, 77.16, 76.74, 33.42, 32.19, 29.93, 29.43, 24.63, 22.94, 14.31, 12.40.

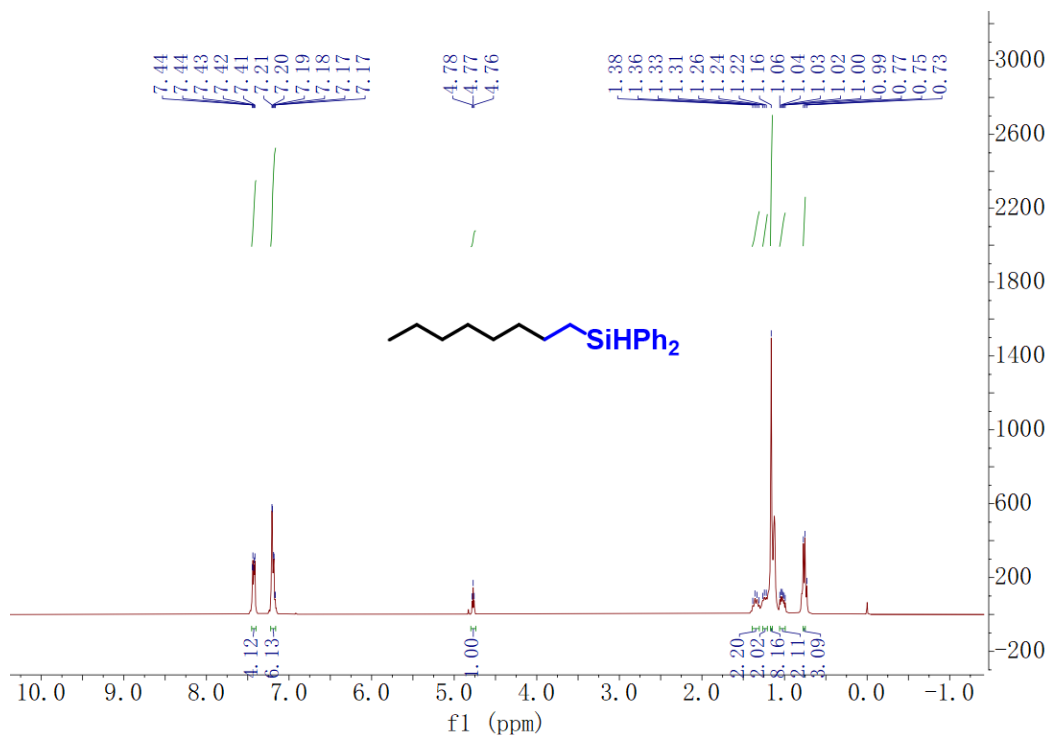

Fig.S40  $^1\text{H}$  NMR of 4q ( $\text{CDCl}_3$ )

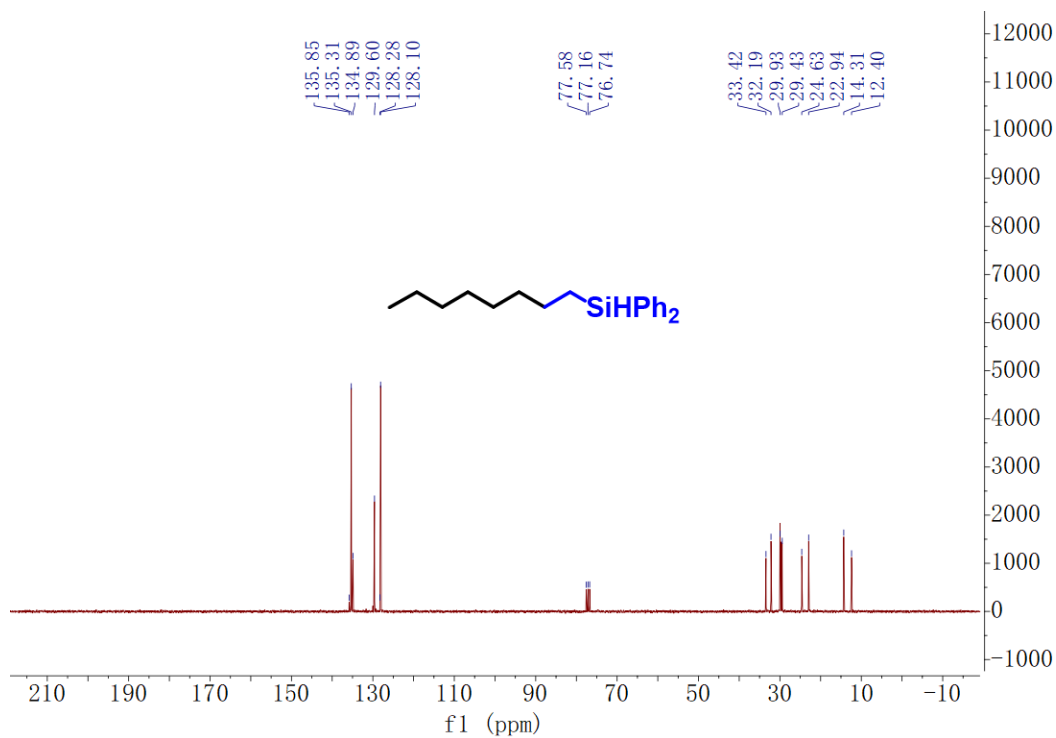

Fig.S41  $^{13}\text{C}$  NMR of 4q ( $\text{CDCl}_3$ )

### (6-Chlorohexyl)phenylsilane (**4r**)

$^1\text{H}$  NMR (300 MHz,  $\text{CDCl}_3$ )  $\delta$  7.57 – 7.51 (m, 4H), 7.38 – 7.31 (m, 6H), 4.85 (t,  $J = 3.7$  Hz, 1H), 3.46 (t,  $J = 6.7$  Hz, 2H), 1.70 (p,  $J = 6.8$  Hz, 2H), 1.49 – 1.34 (m, 6H), 1.18 – 1.10 (m, 2H).  $^{13}\text{C}$  NMR (75 MHz,  $\text{CDCl}_3$ )  $\delta$  135.18, 134.58, 129.60, 128.05, 77.53, 77.11, 76.69, 45.15, 32.56, 32.37, 26.52, 24.32, 12.14.

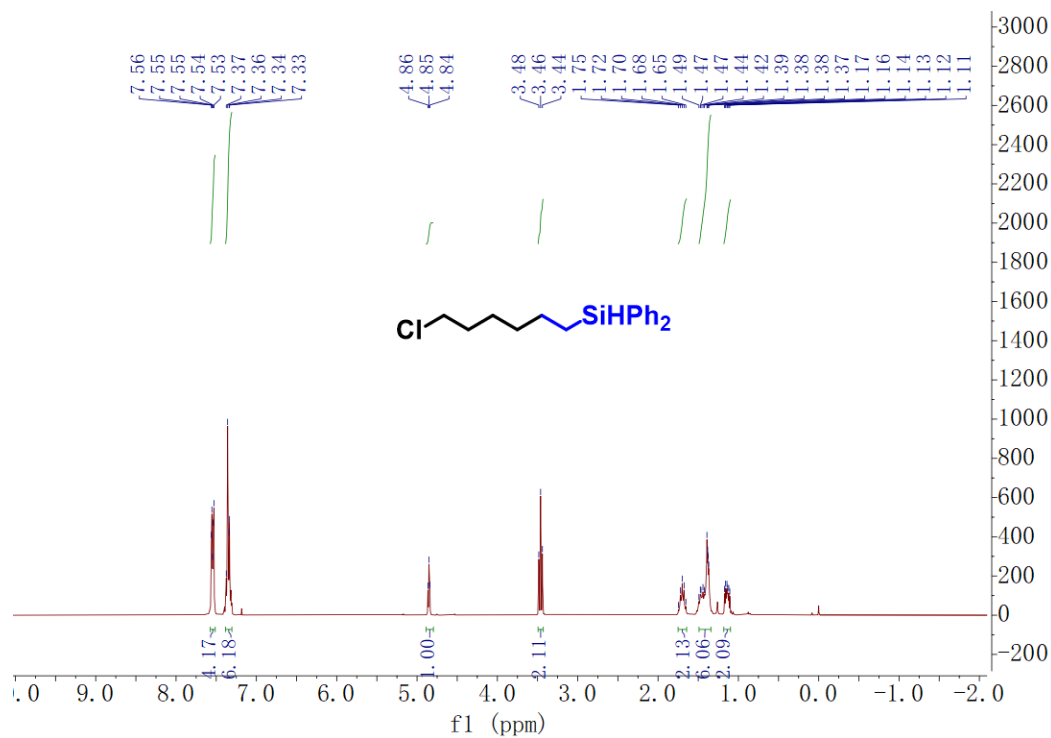

Fig.S42  $^1\text{H}$  NMR of **4r** ( $\text{CDCl}_3$ )

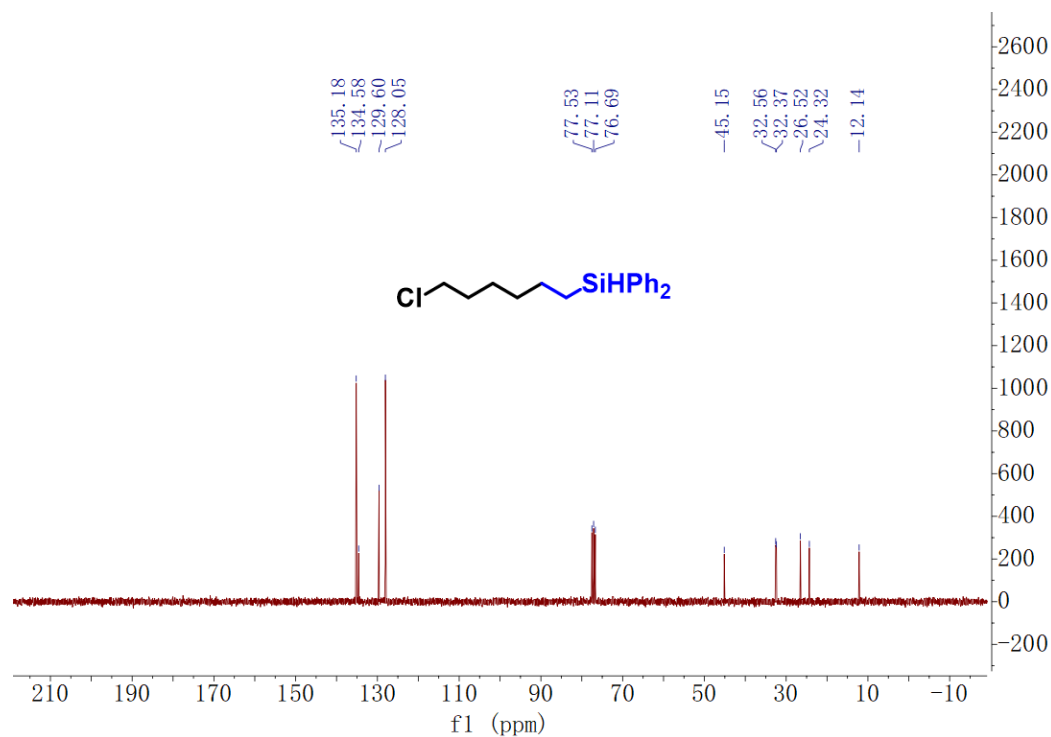

Fig.S43  $^{13}\text{C}$  NMR of **4r** ( $\text{CDCl}_3$ )

**(2-cyclohexylethyl)diphenylsilane (4t)**

$^1\text{H}$  NMR (300 MHz,  $\text{CDCl}_3$ )  $\delta$  7.57 – 7.51 (m, 4H), 7.33 (d,  $J = 6.0$  Hz, 6H), 4.84 (t,  $J = 3.3$  Hz, 1H), 1.69 (t,  $J = 14.9$  Hz, 5H), 1.32 (dd,  $J = 8.4, 6.0$  Hz, 2H), 1.22 – 1.07 (m, 6H), 0.83 (q,  $J = 11.6, 10.5$  Hz, 2H).  $^{13}\text{C}$  NMR (75 MHz,  $\text{CDCl}_3$ )  $\delta$  135.20, 134.80, 129.52, 128.20, 128.01, 77.51, 77.09, 76.67, 40.55, 32.99, 31.92, 26.83, 26.48, 9.28.

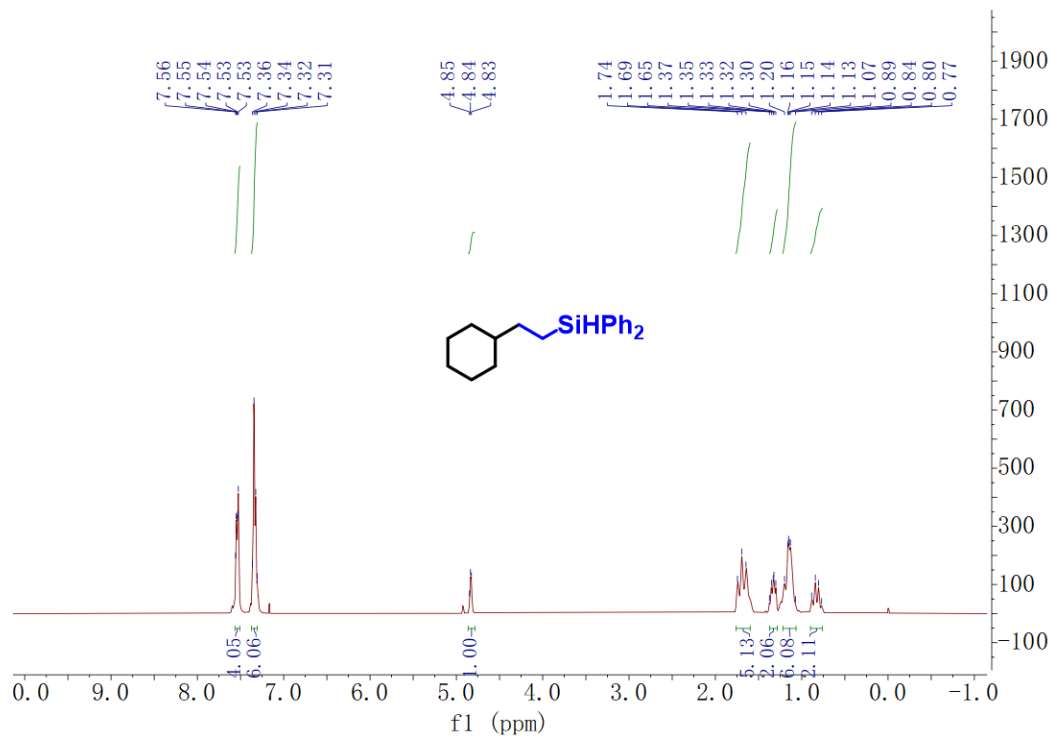

Fig.S44  $^1\text{H}$  NMR of **4t** ( $\text{CDCl}_3$ )

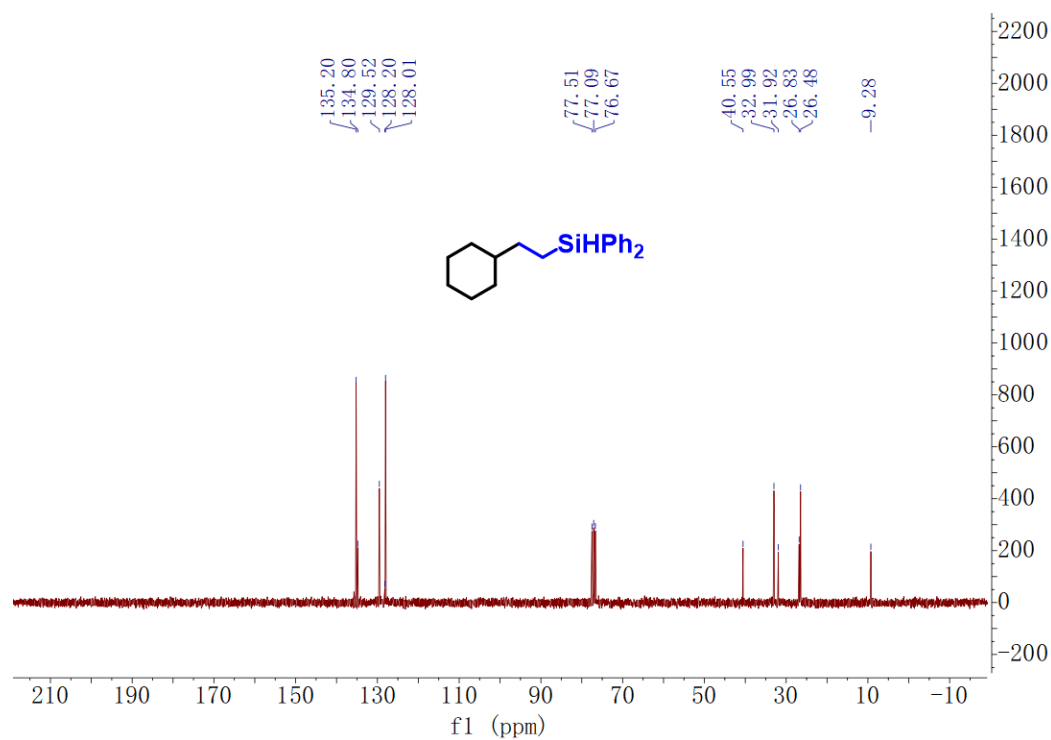

Fig.S45  $^{13}\text{C}$  NMR of **4t** ( $\text{CDCl}_3$ )



**(2-(cyclohex-3-en-1-yl)ethyl)diphenylsilane (4u)**

$^1\text{H}$  NMR (300 MHz,  $\text{CDCl}_3$ )  $\delta$  7.58 – 7.51 (m, 4H), 7.34 (d,  $J = 6.1$  Hz, 6H), 5.63 (d,  $J = 2.5$  Hz, 2H), 4.86 (t,  $J = 3.7$  Hz, 1H), 2.17 – 2.06 (m, 1H), 2.00 (d,  $J = 4.0$  Hz, 2H), 1.74 (d,  $J = 14.3$  Hz, 1H), 1.69 – 1.57 (m, 1H), 1.56 – 1.47 (m, 1H), 1.46 – 1.37 (m, 2H), 1.22 – 1.11 (m, 3H).  $^{13}\text{C}$  NMR (75 MHz,  $\text{CDCl}_3$ )  $\delta$  135.23, 134.69, 129.61, 128.08, 127.15, 126.66, 77.56, 77.14, 76.72, 36.45, 31.67, 31.21, 28.55, 25.42, 9.37.

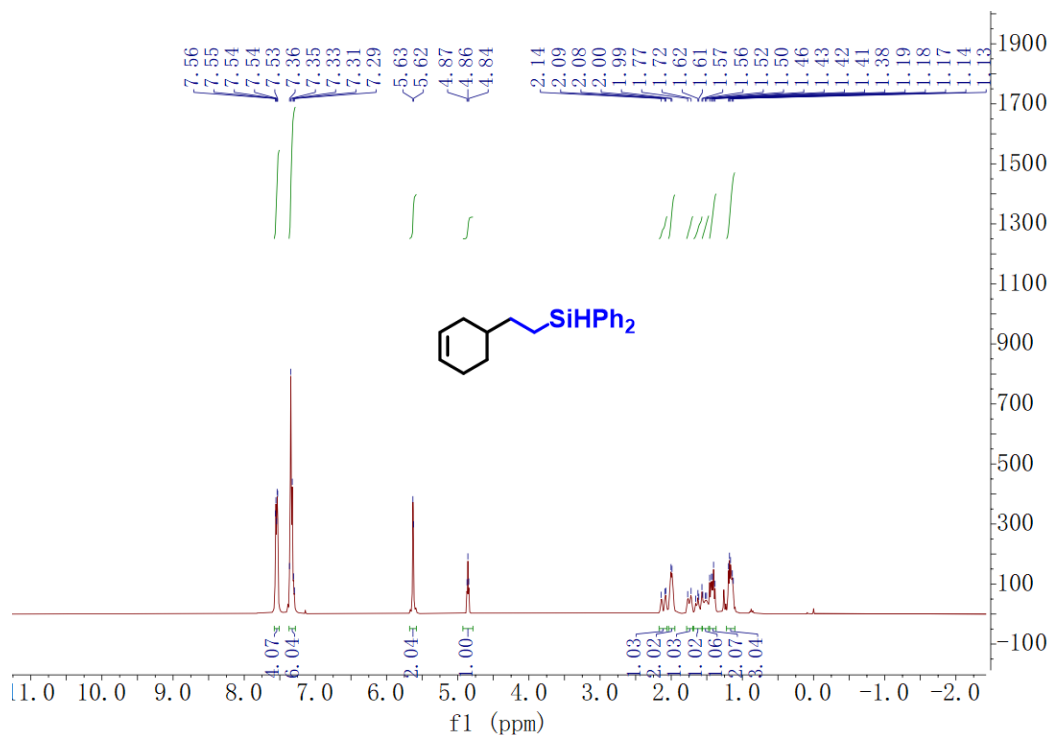

Fig.S46  $^1\text{H}$  NMR of **4u** ( $\text{CDCl}_3$ )

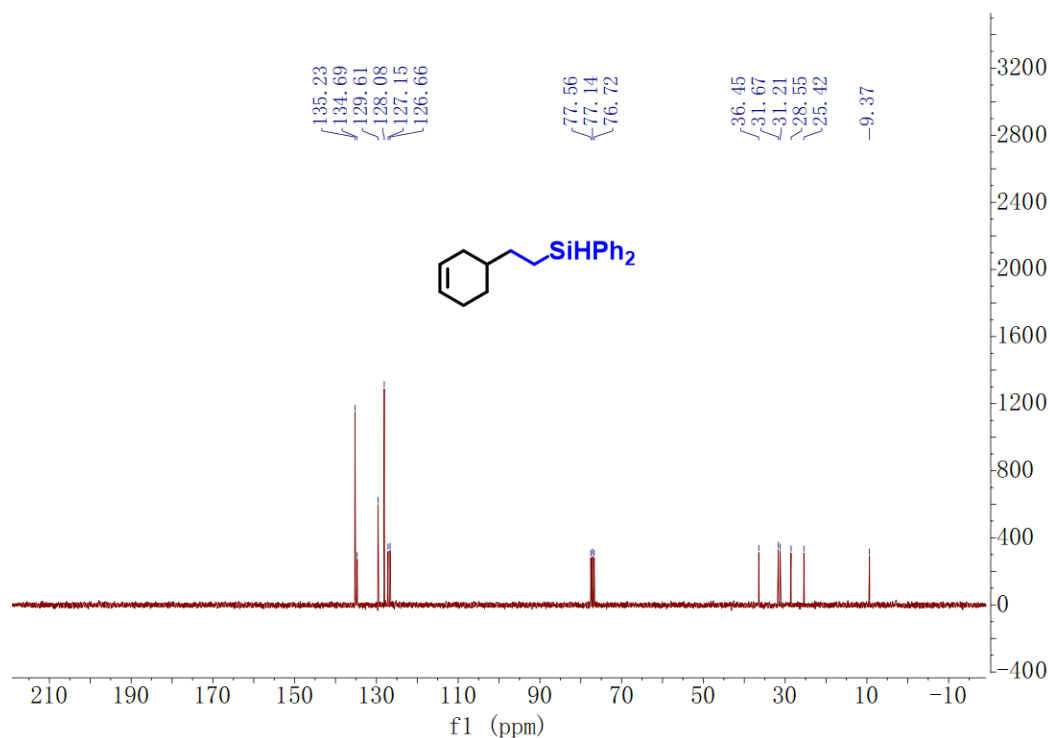

Fig.S47  $^{13}\text{C}$  NMR of **4u** ( $\text{CDCl}_3$ )

### Diphenyl (4-phenylbutyl)silane (4x)

$^1\text{H}$  NMR (300 MHz,  $\text{CDCl}_3$ )  $\delta$  7.44 – 7.39 (m, 4H), 7.20 (d,  $J = 7.1$  Hz, 6H), 7.10 (t,  $J = 7.2$  Hz, 2H), 7.04 – 6.96 (m, 3H), 4.77 (t,  $J = 3.7$  Hz, 1H), 2.48 – 2.39 (m, 2H), 1.57 (p,  $J = 7.2$  Hz, 2H), 1.46 – 1.34 (m, 2H), 1.05 (dt,  $J = 11.5, 3.8$  Hz, 2H).  $^{13}\text{C}$  NMR (75 MHz,  $\text{CDCl}_3$ )  $\delta$  142.80, 135.38, 134.74, 129.77, 128.61, 128.48, 128.23, 125.84, 77.72, 77.29, 76.87, 35.74, 35.09, 24.35, 12.27.

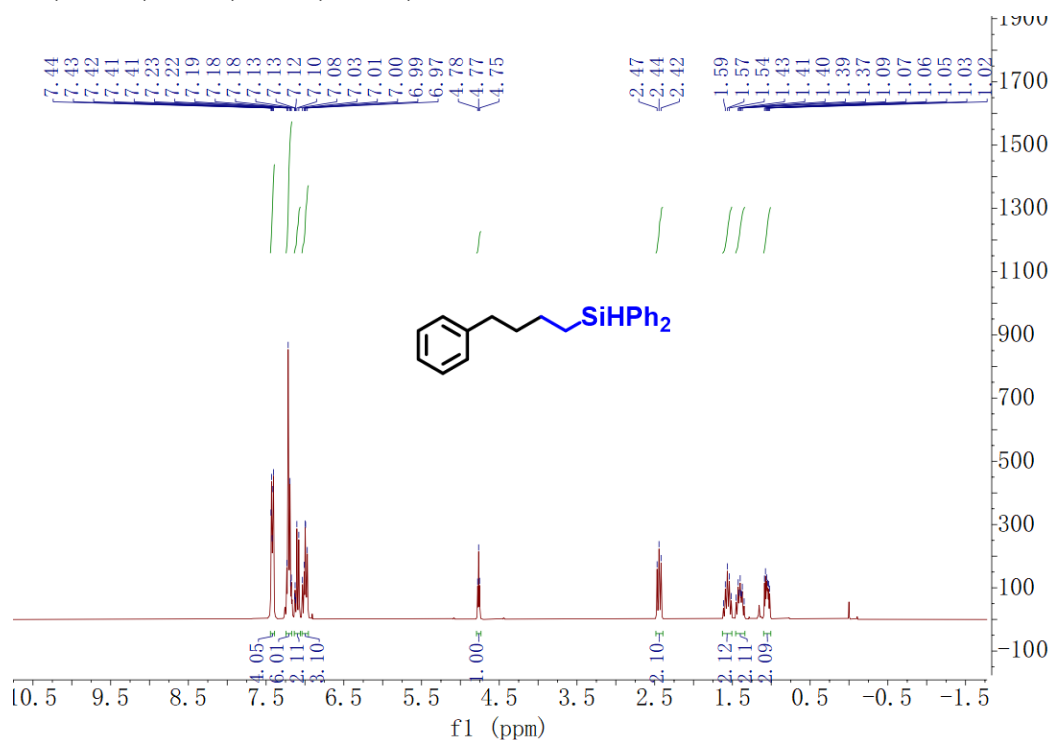

Fig.S48  $^1\text{H}$  NMR of **4x** ( $\text{CDCl}_3$ )

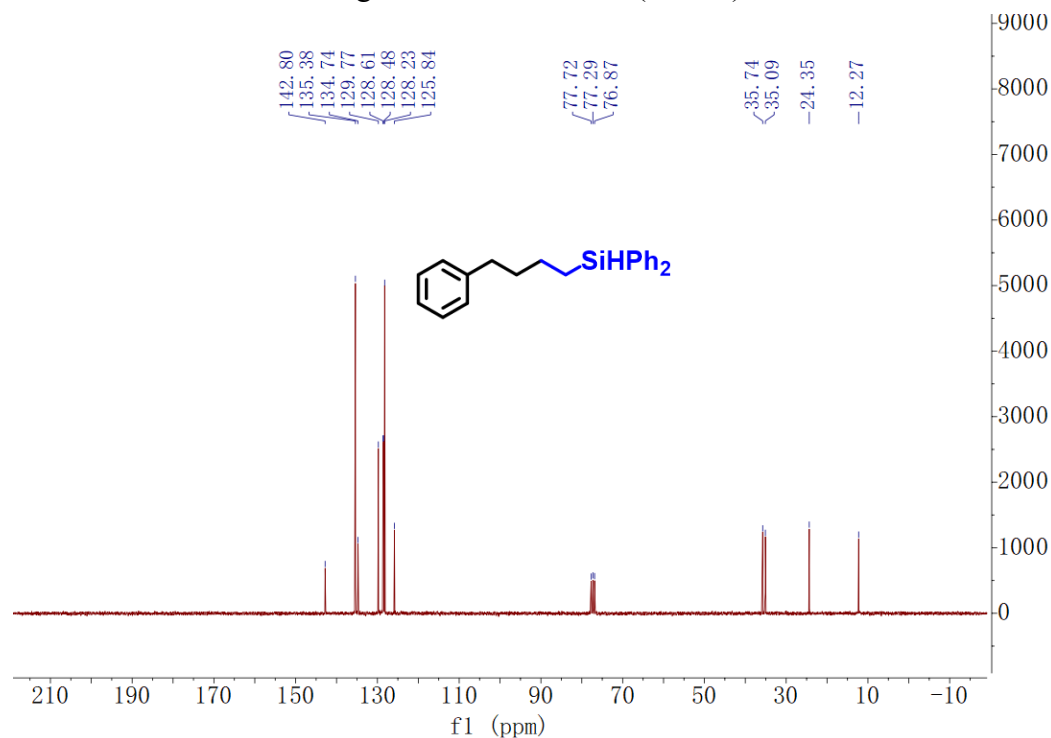

Fig.S49  $^{13}\text{C}$  NMR of **4x** ( $\text{CDCl}_3$ )

### Diphenyl(3-phenylpropyl)silane (4y)

$^1\text{H}$  NMR (300 MHz,  $\text{CDCl}_3$ )  $\delta$  7.52 (dd,  $J = 7.3, 1.9$  Hz, 4H), 7.37 – 7.29 (m, 6H), 7.23 (t,  $J = 7.1$  Hz, 2H), 7.13 (dd,  $J = 13.1, 7.4$  Hz, 3H), 4.87 (t,  $J = 3.7$  Hz, 1H), 2.65 (t,  $J = 7.5$  Hz, 2H), 1.78 (p,  $J = 8.7, 8.3$  Hz, 2H), 1.20 – 1.11 (m, 2H).  $^{13}\text{C}$  NMR (75 MHz,  $\text{CDCl}_3$ )  $\delta$  142.26, 135.26, 134.49, 129.67, 128.65, 128.37, 128.11, 125.85, 77.57, 77.15, 76.73, 39.36, 26.43, 11.97.

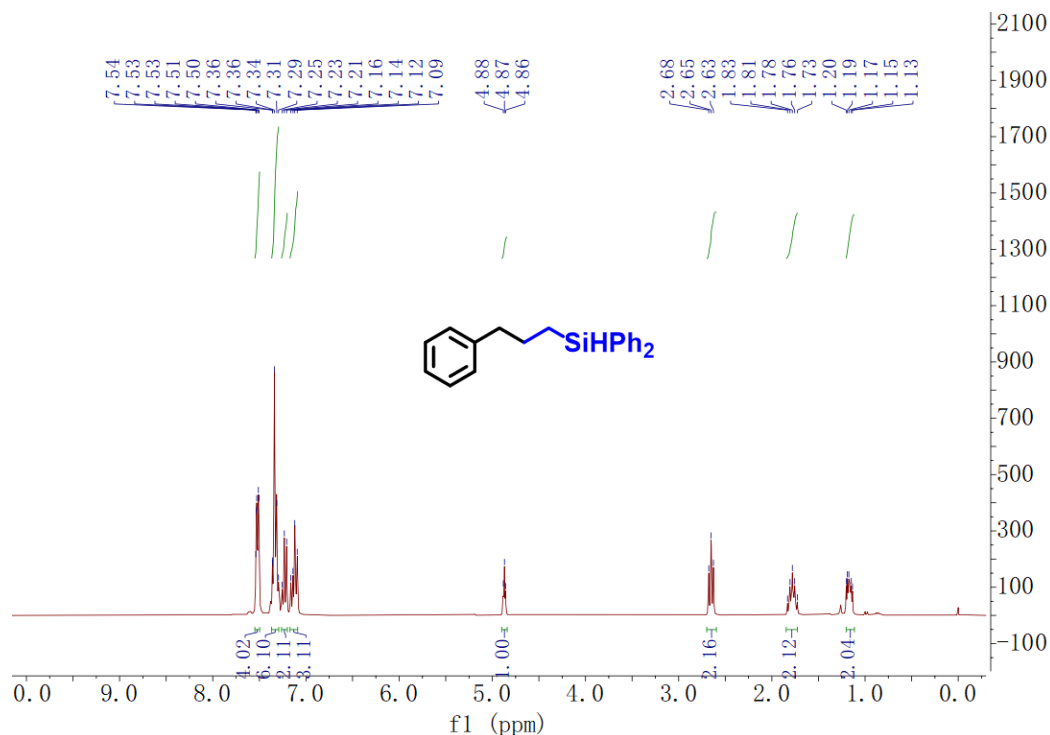

Fig.S50  $^1\text{H}$  NMR of 4y ( $\text{CDCl}_3$ )

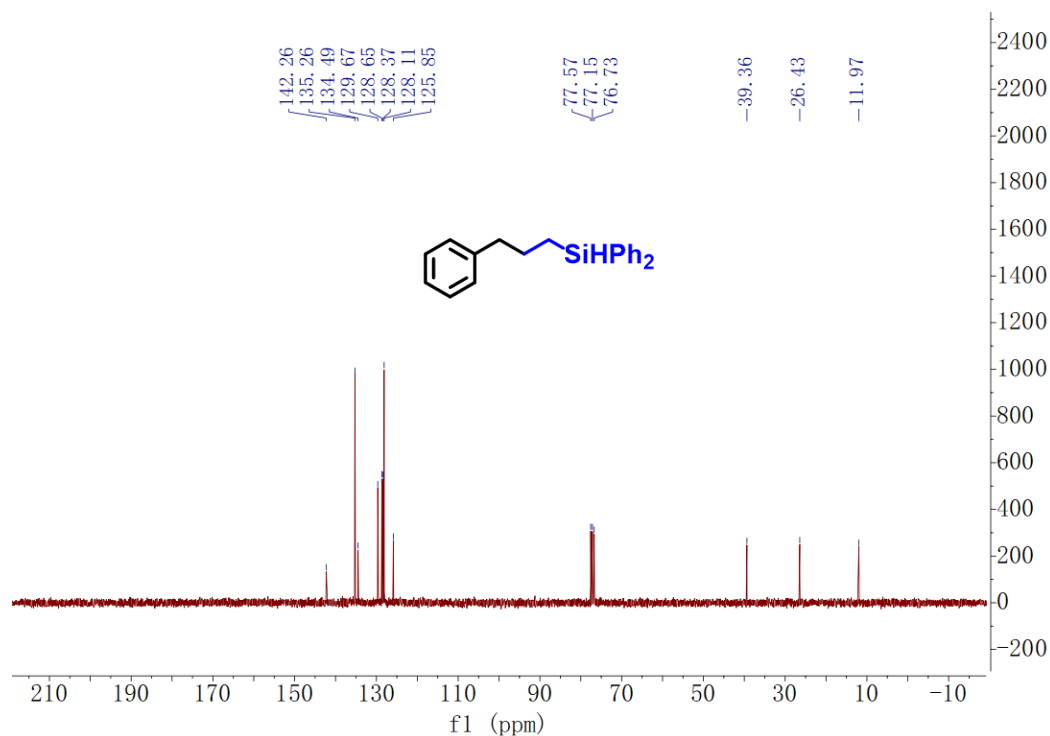

Fig.S51  $^{13}\text{C}$  NMR of 4y ( $\text{CDCl}_3$ )

### SIII. Mechanistic study

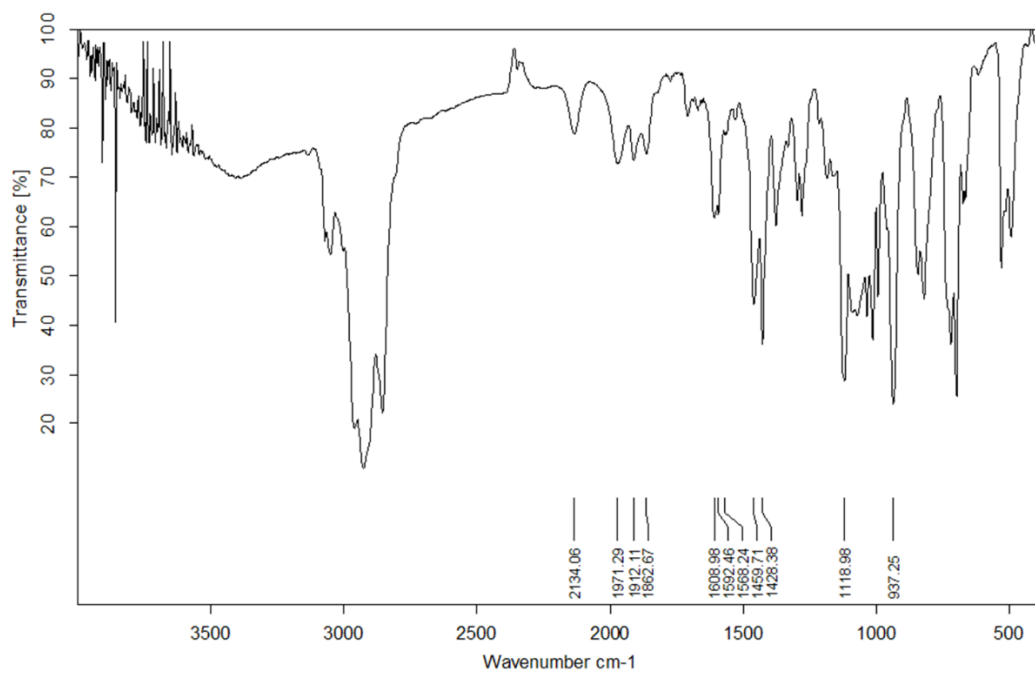

Fig. S52 IR spectrum of the reaction of complex **1** with  $\text{SiH}_2\text{Ph}_2$  for 20 min.

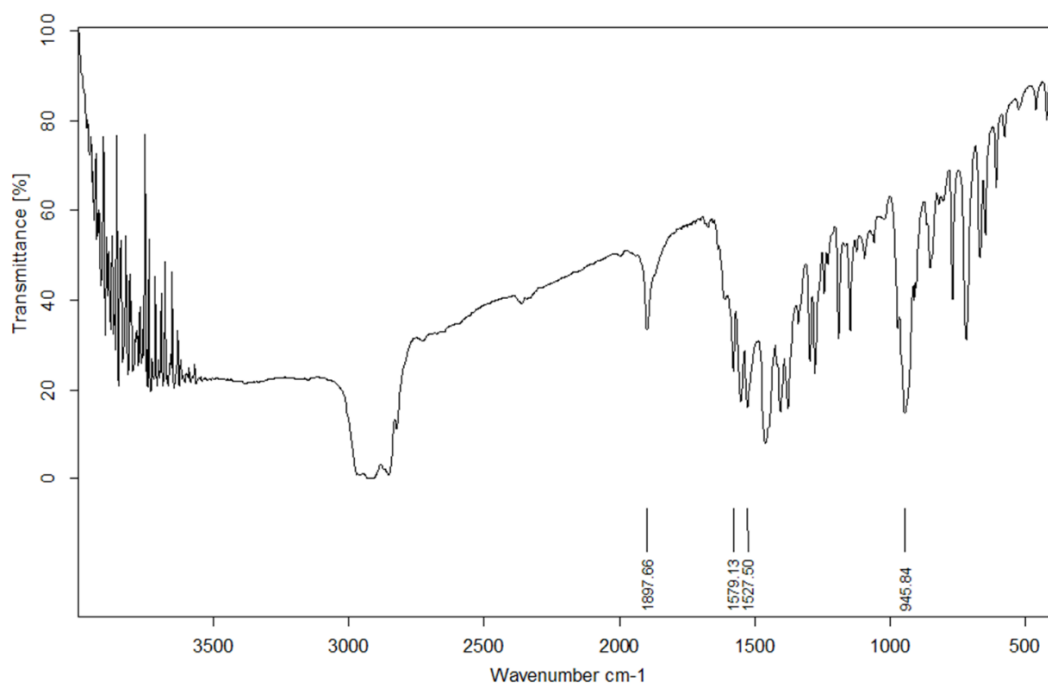

Fig. S53 IR spectrum of the reaction of complex **1** with styrene for 1 h

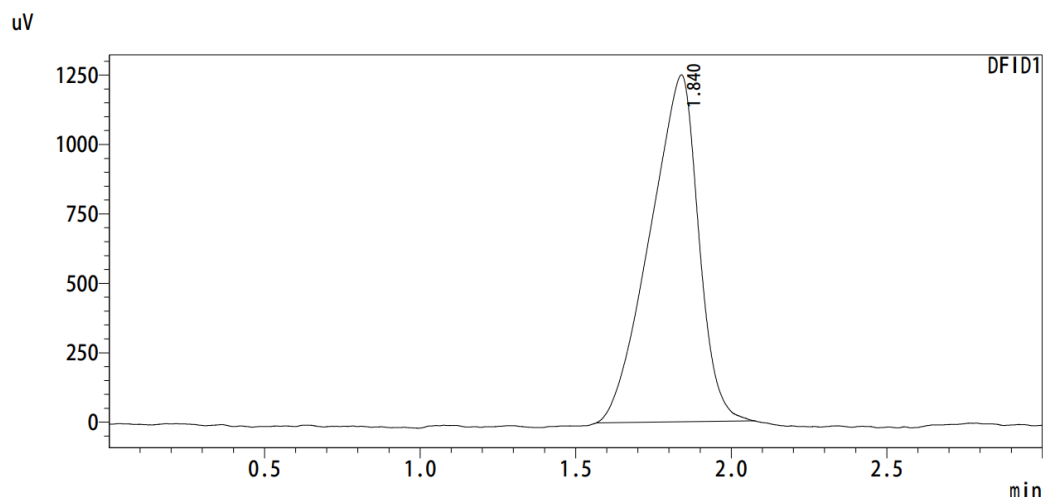

Fig. S54 Formation of dihydrogen in the reaction of complex **1** and  $\text{Ph}_2\text{SiH}_2$  was confirmed by GC.

#### SIV The competitive intermolecular catalytic hydrosilylation of styrene and vinyl cyclohexane

Catalyst **1** (1% mol) was added to a 20mL-Schlenk tube containing a magnetic stirrer under a nitrogen atmosphere. Then styrene (0.104 g, 1.0 mmol), vinyl cyclohexane (0.11 g, 1.0 mmol), diphenylsilane (0.18 g, 1.0 mmol), and *n*-dodecane (0.17 g, 1.0 mmol) were added to the tube in sequence. The mixture was stirred at 50 °C for 1 h. The reaction products were analyzed using GC.

#### SV Gram-Scale Reaction

Under a nitrogen atmosphere catalyst **1** (1% mol) was added to a 20mL-Schlenk tube containing magnetic stirrer. Then styrene (1.04 g, 10.0 mmol) and diphenylsilane (2.21 g, 12.0 mmol) were added to this tube in sequence. The mixture was stirred at 50 °C for 1 h. The generated mixture was quenched with ethyl acetate and the solvents were evaporated. Using petroleum ether as the eluent, 2.65 g (b: l = 99:1) of the product was separated by column chromatography.
